# Supplementary material for: A common 1.6 mb Y-chromosomal inversion predisposes to subsequent deletions and severe spermatogenic failure in humans
Source: eLife. 2021 Mar 30;10:e65420. doi: 10.7554/eLife.65420 (PMC8009663; doi:10.7554/eLife.65420)
Supplement: Supplementary file 1. [file elife-65420-supp1.xlsx]

## Sheet: Sheet1
Supplementary file 1. Characteristics of the Estonian patients with idiopathic spermatogenic impairment and the used reference groups showing mean and standard deviation values
	Idiopathic patients with spermatogenic failure						Reference groups of Estonian men
Sample size/parameter	Azoo- and cryptozoospermia (n=192)		Severe oligozoospermia (n=319)		Moderate oligo-zoospermia (n=679)		Partners of pregnant women (n=324)		Estonian young men cohort (n=499)		REPROMETA proven fathers (n=311)
A. Sample size (n)
all men (n)	192		319		679		324		499		311
men with sperm counts >0 – 10 x 106	192		319		0		1		12		n.a.
men with sperm counts >10 – 39 x 106	0		0		679		7		35		n.a.
No semen analysis performed							4		9		n.a.
B. Distribution of clinical data
Parameter	mean	±SD	mean	±SD	mean	±SD	mean	±SD	mean	±SD	mean	±SD
Age (years)	34.8191	8.91641	33.6731	7.76562	32.4712	7.10056	31.8894	6.58091	19.2516	1.77478	31.25	7.92505
BMI (kg/m2)	26.7976	4.0098	26.8934	4.63534	26.3745	4.67458	25.4527	3.92011	22.3301	2.74568	26.1998	3.90358
Abstinence period (days)	4.40833	3.97003	3.52492	1.56851	3.677	1.99575	4.51406	4.54279	115.42	55.4976	n.a.	n.a.
Total testis volume (ml)	33.7292	10.3438	38.6877	10.059	40.0478	8.84196	46.8822	10.0368	50.7976	10.7342	n.a.	n.a.
Semen volume (ml)	3.52995	1.81013	3.49527	1.70154	3.84096	1.6347	4.13293	1.83333	3.45122	1.6203	n.a.	n.a.
Sperm concentration (million/ml)	0.0677604	0.149948	2.01514	2.0006	7.40671	4.95755	98.0601	80.1297	87.914	81.1603	n.a.	n.a.
Total sperm count (million/ejaculate)	0.173059	0.243502	5.15886	2.6436	23.4435	8.43098	382.975	330.056	289.363	297.928	n.a.	n.a.
Progressive motility (A+B) (%)	5.48677	13.092	19.3249	15.4112	27.4462	16.4767	49.6885	12.4457	56.3633	12.4411	n.a.	n.a.
Normal morphology (%)	0.181818	0.702014	1.35577	2.54573	2.71429	3.15074	9.79375	5.60743	12.0335	4.98895	n.a.	n.a.
FSH (IU/L)	16.5836	12.0548	8.40297	6.16605	6.39339	4.49369	4.08828	2.29377	3.2	1.7557	n.a.	n.a.
LH (IU(L)	6.46542	3.84724	5.07244	2.56585	4.53176	2.11414	3.7885	1.65377	4.0263	1.67763	n.a.	n.a.
Total testosterone (nmol/L)	16.8952	9.82925	17.7187	6.95854	17.7102	6.78529	17.0466	5.90259	29.0997	9.29053	n.a.	n.a.
n.a. - not applicable
Reference for the study group and detailed clinical description: Punab M, Poolamets O, Paju P, Vihljajev V, Pomm K, Ladva R, Korrovits P, Laan M (2017) Causes of male infertility: a 9-year prospective monocentre study on 1737 patients with reduced total sperm counts Hum Reprod 32:18-31
Azoospermia – no sperms
Cryptozoospermia – sperm counts >0 – 1 x 106/ejaculate
Severe oligozoospermia – sperm counts >1 – 10 x 106/ejaculate
Moderate oligozoospermia – sperm counts >10 – 39 x 106/ejaculate
Parners of pregnant women – men recruitd at couple's pregnancy, sperm counts >39 x106
Reference for the study group and detailed clinical description: Grigorova M, Punab M, Ausmees K, Laan M (2008) FSHB promoter polymorphism within evolutionary conserved element is associated with serum FSH level in men Hum Reprod 23:2160-2166
Estonian young men cohort – no criteria for reproductive parameters at recruitment
Reference for the study group and detailed clinical description: Triin Kikas, Rain Inno, Kaspar Ratnik, Kristiina Rull, Maris Laan (2020) C-allele of rs4769613 near FLT1 represents a high-confidence placental risk factor for preeclampsia. Hypertension, in press.
REPROMETA proven fathers - recruitment of the couple at the devliery of the newborn
