# Supplementary material for: A common 1.6 mb Y-chromosomal inversion predisposes to subsequent deletions and severe spermatogenic failure in humans
Source: eLife. 2021 Mar 30;10:e65420. doi: 10.7554/eLife.65420 (PMC8009663; doi:10.7554/eLife.65420)
Supplement: Supplementary file 2. [file elife-65420-supp2.xlsx]

## Sheet: Sheet1
Supplementary file 2. Frequencies of AZFc partial deletions identified in patients and reference groups
					AZFc b2/b3 based on Y-lineages
Subgroup based on sperm counts	Definition	Sample size	AZFc gr/gr (~1.6 Mb)	AZFc b2/b3 (~1.8 Mb)	hgN3*	non-hgN	AZFc b1/b3 (~1.6 Mb)	Other AZF rearrangement	All rearrangements (n, %)
Patients with spermatogenic impairment (n=1,190)
Azoospermia	Sperm counts 0	104	2 (1.9%)	29 (27.9%)	29 (27.9%)	0 (0%)	0 (0%)	0 (0%)	31 (29.8%)
Cryptozoospermia	Sperm counts >0 – 1 x 106/ejaculate	88	6 (6.8%)	27 (30.7%)	27 (30.7%)	0 (0%)	0 (0%)	0 (0%)	33 (37.5%)
Severe oligozoospermia	Sperm counts >1 – 10 x 106/ejaculate	319	11 (3.4%)	110 (34.5%)	110 (34.5%)	0 (0%)	0 (0%)	1 case missing b2/b3 deletion marker sY1191, but no DAZ genes (0.3%)	122 (38.2%)
Moderate oligozoospermia	Sperm counts >10 – 39 x 106/ejaculate	679	13 (1.9%)	222 (32.7%)	221 (32.5%)	1 (0.1%)	0 (0%)	0 (0%)	235 (34.6%)
All patients		1190	32 (2.7%)**	388 (32.6%)	387 (32.5%)	1 (0.1%)	0 (0%)	1 (0%)	421 (35.4%)
Reference groups (n=1,134)
Partners of pregnant women	Recruitment at couple's pregnancy, sperm counts > 39 x 106/ejaculate	324	4 (1.2%)	122 (37.7%)	121 (37.3%)	1 (0.3%)	0 (0%)	0 (0%)	126 (38.9%)
Estonian young men cohort	No criteria for reproductive parameters at recruitment	499	6 (1.2%)	139 (27.9%)	137 (27.5%)	2 (0.4%)	1 (0.2%)	1 case missing the marker sY84 suggesting a partial AZFa deletion (0.2%)***	147 (29.5%)
REPROMETA proven fathers	Recruitment of the couple at the delivery of the newborn	311	4 (1.3%)	106 (34.1%)	n.d.	n.d.	0 (0%)	0 (0%)	110 (35.4%)
All reference men		1134	14 (1.2%)**	367 (32.4%)	364 (32.1%)	3 (0.4%)	1 (0.1%)	1 (0.1%)	383 (33.8%)
* Frequency of haplogroup N3 in Estonian population has been reported 31.8% [Ref: Tambets et al (2018) Genes Reveal Traces of Common Recent Demographic History for Most of the Uralic-speaking Populations. Genome Biol 19(1):139.]
** frequency of gr/gr deletions in patients (2.7%) compared to reference men (1.2%), Fisher's exact test, p=0.016; OR = 2.2 [95% CI 1.2 - 4.2]
*** Recently described in: Jia et al (2020) A fertile male with a single sY86 deletion on the Y chromosome Asian J Androl 22:333-334
n.d., not determined
