# Supplementary material for: A common 1.6 mb Y-chromosomal inversion predisposes to subsequent deletions and severe spermatogenic failure in humans
Source: eLife. 2021 Mar 30;10:e65420. doi: 10.7554/eLife.65420 (PMC8009663; doi:10.7554/eLife.65420)
Supplement: Supplementary file 3. [file elife-65420-supp3.xlsx]

## Sheet: Sheet1
Supplementary file 3. Andrological parameters of patients and reference cases with and without the AZFc rearrangements
Idiopathic patients with spermatogenic failure (n=1190)
			AZFc gr/gr deletion carriers		Pairwise Wilcoxon Rank Sum Test			Pairwise Wilcoxon Rank Sum Test	AZFc b2/b3 deletion carriers c		Pairwise Wilcoxon Rank Sum Test			Pairwise Wilcoxon Rank Sum Test			Pairwise Wilcoxon Rank Sum Test
Parameter	No AFZc deletion (n=769)a		Any gr/gr deletion subtype (n=32)			r2/r3' inversion + secondary partial AZFc deletion (n=10)			Any b2/b3 deletion subtype (n=388)			b2/b3 initial deletion only (n=300)			b2/b3 deletion + b2/b4 duplication (n=78)
	median (5-95%)	mean±SD	median (5-95%)	mean±SD	P-valueb	median (5-95%)	mean±SD	P-valueb	median (5-95%)	mean±SD	P-valueb	median (5-95%)	mean±SD	P-valueb	median (5-95%)	mean±SD	P-valueb
Age (years)	31.9 (23.5-45.9)	32.9 (7.4)	32.0 (20.3-48.4)	32.8 (8.3)	0.96	32.4 (26.6-45.0)	34.0 (7.1)	0.57	32.3 (23.2-48.9)	33.8 (8.0)	0.084	33.5 (23.5-49.0)	34.4 (8.0)	0.0023	30.0 (23.2-46.1)	31.8 (8.0)	0.061
BMI (kg/m2)	25.8 (20.2-34.6)	26.6 (4.6)	25.5 (20.6-33.2)	25.6 (3.9)	0.29	27.8 (22.4-33.1)	28.2 (4.0)	0.14	26.1 (20.3-35.5)	26.6 (4.6)	0.87	26.1 (20.2-35.5)	26.6 (4.7)	0.85	26.2 (21.5-33.4)	26.8 (4.0)	0.52
Total testis volume (ml)	40.0 (22.0-52.0)	39 (10)	35.0 (27.6-52.7)	38 (9.1)	0.35	33.5 (24.7-48.2)	34.9 (8.4)	0.14	39.0 (22.0-50.0)	38.1 (9.1)	0.18	38.0 (22.0-50.0)	37.8 (9.1)	0.1	38.5 (21.8-50.0)	38.2 (9.1)	0.59
Semen volume (ml)	3.6 (1.3-6.8)	3.7 (1.7)	2.9 (1.0-6.0)	3 (1.7)	0.0049	2.3 (1.2-6.1)	2.9 (1.9)	0.046	3.5 (1.4-7.2)	3.7 (1.7)	0.13	3.5 (1.3-7.0)	3.6 (1.7)	0.088	3.3 (1.5-7.9)	3.9 (2.0)	0.98
Sperm concentration (106/ml)	3.6 (0-13)	4.9 (7.6)	2.4 (0-19.5)	5.5 (7.1)	0.86	1.0 (0-10.8)	2.7 (4.4)	0.06	4.0 (0-14.0)	4.9 (4.8)	0.45	4.0 (0-14.0)	4.8 (4.5)	0.58	4.0 (0-15.0)	5.2 (5.8)	0.63
Total sperm count (106/ejaculate)	12.5 (0-35.8)	14.8 (12)	8.1 (0.1-37.7)	13.8 (14.3)	0.45	2.0 (0.1-22.6)	5.6 (10.7)	0.011	13.0 (0-35.6)	14.8 (11.8)	0.97	12.6 (0-35.2)	14.3 (11.6)	0.59	16.5 (0-36.0)	16.4 (12.5)	0.39
Progressive A+B motility (%)	21 (0-53)	22.3 (17.8)	16.5 (0-50.1)	18.5 (16.9)	0.25	13.0 (0-30.0)	12.1 (11.5)	0.09	20.0 (0-51.0)	21.2 (17.1)	0.49	20.0 (0-52.2)	21.5 (17.4)	0.65	19.5 (0-50.2)	20.2 (16.4)	0.39
Normal morphology (%)	1.0 (0-8.0)	2.3 (3.0)	0.5 (0-6.6)	1.8 (2.4)	0.41	1.0 (0-5.0)	1.8 (2.1)	0.84	1.0 (0-8.0)	1.9 (3.0)	0.014	1.0 (0-8.4)	1.9 (3.2)	0.012	1.0 (0-5.6)	1.8 (2.3)	0.53
FSH (IU/L)	6.1 (1.8-24.1)	8.2 (7.5)	7.0 (2.2-26.0)	10.0 (8.9)	0.2	8.9 (2.5-34.7)	14.5 (12.9)	0.1	6.6 (1.9-25.1)	9.2 (7.7)	0.031	6.9 (1.9-25.7)	9.6 (7.9)	0.014	6.3 (1.9-23.0)	8.5 (7.3)	0.54
LH (IU(L)	4.3 (1.8-10.0)	4.9 (2.8)	5.2 (2.3-11.0)	5.6 (2.8)	0.14	5.3 (3.0-11.2)	6.1 (3.0)	0.18	4.5 (1.8-9.8)	5.0 (2.5)	0.28	4.6 (1.7-10.3)	5.1 (2.6)	0.22	4.4 (2.3-9.2)	4.9 (2.1)	0.63
Total testosterone (nmol/L)	16.1 (8.0-31.3)	17.5 (7.9)	20.2 (11.0-28.8)	20.1 (5.8)	0.0039 c	22.8 (10.0-28.8)	20.9 (6.9)	0.066	16.9 (8.7-29.0)	17.6 (6.4)	0.21	16.7 (8.6-28.0)	17.4 (6.3)	0.44	17.3 (10.2-29.6)	18.0 (6.7)	0.28
a men without any AZFc partial deletions; this group was used in all comparisons with deletion carriers for the distribution of clinical parameters
b Statistical significance threshold after correction for multiple testing was estimated P<1.0 x 10-3 (a total of 5 tests x 10 independent parameters). Nominal P-values <0.05 in the 'r2/r3 inversion + secondary partial AZFc deletion' group are shown in bold
c clinically insignificant observation (normal range 8.64 – 29.0 nmol/L)
d see also Supplementary file 4 for linear regression analysis adjusted for cofactors (age, BMI, abstinence time)
Reference groups ‘Partners of pregnant women’ and ‘Estonian Young men cohort’ a (subjects with semen analysis, n=810)
			AZFc gr/gr deletion carriers		Pairwise Wilcoxon Rank Sum Test				AZFc b2/b3 deletion carriers d		Pairwise Wilcoxon Rank Sum Test			Pairwise Wilcoxon Rank Sum Test			Pairwise Wilcoxon Rank Sum Test
Parameter	No AFZ deletion (n=550)b		Any gr/gr deletion subtype (n=10)			r2/r3' inversion + secondary partial AZFc deletion (n=2)			Any b2/b3 deletion subtype (n=261)			b2/b3 initial deletion only (n=210)			b2/b3 deletion + b2/b4 duplication (n=34)
	median (5-95%)	mean±SD	median (5-95%)	mean±SD	P-valuec				median (5-95%)	mean±SD	P-valuec	median (5-95%)	mean±SD	P-valuec	median (5-95%)	mean±SD	P-valuec
Age (years)	20.3 (17.3-38.3)	23.7 (7.4)	20.2 (17.9-37.3)	24.1 (7.7)	0.75				22.3 (17.5-39.3)	25.4 (7.8)	0.00038	22.3 (17.5-40.0)	25.6 (8.0)	0.00028	25.0 (17.5-36.4)	26 (7.5)	0.059
BMI (kg/m2)	22.6 (19.0-30.4)	23.3 (3.5)	22.4 (19.9-27.2)	23.1 (2.8)	0.99	Individual clinical data of the two reference men carrying this AZFc rearrangement is provided in Supplementary file 12			23.5 (18.9-31.2)	24.0 (3.8)	0.002	23.5 (19.4-31.2)	24.0 (3.8)	0.0024	24.5 (19.6-31.5)	25 (3.8)	0.0071
Total testis volume (ml)	49.0 (35.0-70.0)	49.2 (10.7)	43.5 (28.5-56.9)	43 (10.1)	0.067				48.0 (35.8-70.0)	49.7 (10.5)	0.97	48.0 (36.0-70.0)	49.7 (10.5)	0.99	48.0 (39.6-70.8)	51.1 (9.6)	0.42
Semen volume (ml)	3.4 (1.3-7.0)	3.7 (1.7)	3.8 (2.0-6.3)	3.9 (1.7)	0.69				3.5 (1.3-7.6)	3.8 (1.8)	0.33	3.5 (1.3-7.6)	3.8 (1.8)	0.31	3.5 (1.5-7.4)	3.8 (1.9)	0.73
Sperm concentration (106/ml)	74.5 (11.0-229.4)	91.4 (77.8)	63.0 (28.5-161.3)	78.2 (53.4)	0.69				68.8 (9.9-240.0)	94.3 (88.1)	0.91	66.0 (10.1-241.2)	93.8 (91.0)	0.8	80.5 (17.3-237.5)	96.7 (69.8)	0.52
Total sperm count (106/ejaculate)	249.9 (25.2-834.3)	320.3 (305.6)	220.3 (74.2-559.0)	276.8 (170.9)	0.98				249.8 (27.6-895.6)	343.3 (336.9)	0.59	240.0 (41.7-968.7)	343.8 (351.8)	0.74	277.3 (39.9-726.2)	343.0 (237.8)	0.3
Progressive A+B motility (%)	55.0 (33.7-74.3)	54.6 (12.9)	60.5 (36.0-67.5)	55.9 (12.7)	0.59				53.0 (29.2-70.3)	51.9 (12.8)	0.0052 e	52.0 (30.7-69.5)	51.4 (12.5)	0.0013 e	57.0 (26.6-73.1)	53.9 (13.7)	1
Normal morphology (%)	11.0 (3.0-20.0)	11.3 (5.3)	11.5 (6.5-18.2)	11.5 (4.5)	0.92				11.0 (2.0-20.5)	10.9 (5.5)	0.3	11.0 (2.0-20.0)	10.8 (5.5)	0.31	10.5 (3.0-18.7)	10.3 (5.5)	0.31
FSH (IU/L)	3.2 (1.3-7.1)	3.6 (1.9)	3.6 (2.5-6.5)	4.1 (1.5)	0.17				2.9 (1.3-7.1)	3.5 (2.2)	0.16	3.0 (1.3-7.1)	3.6 (2.3)	0.71	2.3 (1.4-7.5)	3.1 (2.0)	0.031
LH (IU(L)	3.8 (1.7-7.2)	4.0 (1.7)	4.3 (2.2-11.9)	5.4 (3.7)	0.45				3.6 (1.6-6.4)	3.8 (1.5)	0.084	3.7 (1.6-6.5)	3.9 (1.6)	0.41	3.1 (1.7-5.0)	3.3 (1.1)	0.024
Total testosterone (nmol/L)	23.5 (11.0-42.9)	24.8 (9.9)	20.6 (11.7-36.8)	22.2 (9.9)	0.39				22.5 (10.6-43.0)	23.6 (10.3)	0.081	23.1 (10.7-45.0)	24.0 (10.7)	0.2	19.8 (10.6-36.6)	21.5 (8.7)	0.049
a andrological data was available only for two reference groups, ‘Partners of pregnant women’ and ‘Estonian Young men cohort'; See Supplementary file 1
b men without any AZFc partial deletions and also excluding the case with a likely partial AZFa deletion; this group was used in all comparisons with deletion carriers for the distribution of clinical parameters
c Statistical significance threshold after correction for multiple testing was estimated P<1.25 x 10-3 (a total of 4 tests x 10 independent parameters)
d see also Supplementary file 4 for linear regression analysis adjusted for cofactors (age, BMI, abstinence time)
e clinically insignificant observation (threshold for normal values >32 %)
Accompaning information for Table S3. Clinical reference values for suboptimal parameter measurements
Spermatogenic failure categories, based on sperm counts
Azoospermia – no sperms
Cryptozoospermia – >0 – 1 x 106 sperms/ejaculate
Severe oligozoospermia – >1 – 10 x 106 sperms/ejaculate
Moderate oligozoospermia – >10 – 39 x 106 sperms/ejaculate
Parameter
Progressive A+B motility (%)	<32 %
Normal morphology (%)	<4 %
Semen volume (ml)	<1.5 ml
Total testis volume (ml)	<30 ml
FSH (IU/L)	<1.5 / >12.4 IU/L
LH (IU(L)	<1.7 / > 8.6 IU/L
Total testosterone (nmol/L)	<8.64 / >29.0 nmol/L
Threshold values for seminal parameters are based on international guidelines (World Health Organization 2010).
Reference values for reproductive hormones are defined according to laboratory service provider, United Laboratories of Tartu University Hospital
Empirical threshold for the total testis volume, suggesting intrinsic/congenital testicular damage, was based on routinely applied clinical criteria at the Andrology Centre, Tartu University Hospital
