# Supplementary material for: A common 1.6 mb Y-chromosomal inversion predisposes to subsequent deletions and severe spermatogenic failure in humans
Source: eLife. 2021 Mar 30;10:e65420. doi: 10.7554/eLife.65420 (PMC8009663; doi:10.7554/eLife.65420)
Supplement: Supplementary file 4. [file elife-65420-supp4.xlsx]

## Sheet: Sheet1
Supplementary file 4. Genetic association test with the carrier status of AZFc b2/b3 deletion results using linear regression
		Total testis volume (ml)			Semen volume (ml)			Sperm concentration (million/ml)			Total sperm count (million/ejaculate)			Progressive motility (A+B) (%)			Normal morphology (%)			FSH (IU/L)			LH (IU/L)			Total testosterone (nmol/L)
Linear regression analysis groups	n	p-value	beta	beta std.error	p-value	beta	beta std.error	p-value	beta	beta std.error	p-value	beta	beta std.error	p-value	beta	beta std.error	p-value	beta	beta std.error	p-value	beta	beta std.error	p-value	beta	beta std.error	p-value	beta	beta std.error
Patients with no deletions & patients with all types of b2/b3 deletions	769/388	0.276	-0.71338	0.654185	0.525	-0.0681036	0.107835	0.322	0.212247	0.243956	0.462817	0.544877	0.841301	0.141394	-1.89594	1.2695	0.04565	-0.105452	0.0476565	0.0522	0.558419	0.308203	0.244	0.168843	0.150385	0.0633	0.719057	0.400498
Reference cases with no deletions & reference cases with all types of b2/b3 deletions	550/261	0.278	0.833601	0.780819	0.63	0.0606608	0.129569	0.753	-1.47058	4.7974	0.958	-0.891462	17.5957	0.112371	-1.81531	1.13499	0.2263	-0.79772	0.653872	0.11	-0.196939	0.121553	0.102	-0.197947	0.119505	0.902	0.0732802	0.60511
Patients with no deletions & patients with only initial b2/b3 deletion	769/300	0.19	-0.941518	0.71659	0.469	-0.0853586	0.118306	0.318	0.231638	0.267327	0.430563	0.629835	0.920608	0.043249	-2.91653	1.39126	0.018709	-0.143638	0.052426	0.0338	0.66886	0.341756	0.207	0.202477	0.167319	0.172	0.581769	0.43951
Reference cases with no deletions & reference cases with only initial b2/b3 deletion	550/210	0.2321	0.984519	0.83891	0.658	0.0603756	0.140461	0.725	-1.76124	5.13827	0.919	-1.84817	18.8213	0.102	-2.00473	1.21636	0.1478	-1.05931	0.718477	0.562	-0.0763401	0.132609	0.381	-0.115047	0.131463	0.536	0.398188	0.658885
Patients with no deletions & patients with b2/b3 deletion followed by b2/b4 duplication	769/78	0.608	-0.661088	1.29774	0.944	0.0139803	0.206855	0.9034	0.0506446	0.481033	0.96578	-0.063693	1.70199	0.57606	1.3042	2.55153	0.96029	-0.00472445	0.113525	0.423	0.427629	0.578634	0.546	0.167553	0.292731	0.21325	0.92749	0.785338
Reference cases with no deletions & reference cases with b2/b3 deletion followed by b2/b4 duplication	550/34	0.139038	2.60868	1.8447	0.771581	0.0835024	0.30458	0.538963	6.28206	11.7068	0.488427	25.3873	42.8879	0.9653	0.116758	2.75572	0.7996	-0.348766	1.45136	0.0191	-0.71145	0.284733	0.0445	-0.594335	0.283874	0.641	-0.658569	1.43511
Association testing with the carriership of b2/b3 excluded subjects with the gr/gr event. Andrological data was available only for two reference groups, ‘Partners of pregnant women' and ‘Estonian young men cohort’.
Linear regression analyses of all parameters was performed for natural log transformed values adjusted for age. Genetic association tests with sperm parameters were additionally adjusted for abstinence time and with testosterone levels for BMI. Back-transformed estimates of beta coefficient (effect) and it standard error (s.e) are presented.
Statistical significance threshold after correction for multiple testing was estimated P<1.0 x 10-3 (6 tests x 8 independent parameters)
