# Supplementary material for: A common 1.6 mb Y-chromosomal inversion predisposes to subsequent deletions and severe spermatogenic failure in humans
Source: eLife. 2021 Mar 30;10:e65420. doi: 10.7554/eLife.65420 (PMC8009663; doi:10.7554/eLife.65420)
Supplement: Supplementary file 5. — (a) Y haplogroup distribution of the Estonian patients with idiopathic spermatogenic impairment and reference cases carrying gr/gr deletions. (b) Enrichment of Y-chromosomal lineage R1a1a1b1a1a-M458 in men carrying gr/gr deletion. [file elife-65420-supp5.xlsx]

## Sheet: Sheet1
Supplementary file 5. a. Y haplogroup distribution of the Estonian patients with idiopathic spermatogenic impairment and reference cases carrying gr/gr deletions
	Idiopathic patients with spermatogenic impairment carrying the gr/gr deletion					Reference groups of Estonian men carrying the gr/gr deletion
Y lineage and terminal marker	Total n=31	Azoospermia (n=2)	Cryptozoo-spermia (n=5)	Severe oligozoo-spermia (n=11)	Moderate oligozoo-spermia (n=13)	Total (n=13)	Partner of pregnant women (n=4)	Estonian young men cohort (n=5)	REPROMETA proven fathers (n=4)
A1b-P108	1				1	0
G-M201	0					1	1
I1-M253	0					1		1
I1a1-CTS6364	2			1	1	0
I1a2-S244	3				3	1		1
I2a1b1a-CTS616	1				1	1			1
J-M304	1				1	1	1
J2b2a-L283	2	1			1	0
R1a1a1-M417	1		1			0
R1a1a1b1a1a-M458	1			1		0
R1a1a1b1a1a1a-L260	1			1		1		1
R1a1a1b1a1a1a1a3-YP414	0					1			1
R1a1a1b1a1a1c-CTS11962.1	1	1				0
R1a1a1b1a1a1c1-L1029	2		1		1	0
R1a1a1b1a1a1c1a-YP263	1			1		0
R1a1a1b1a1a1c1c-YP417	2		1	1		0
R1a1a1b1a2a-Z92	2			1	1	1		1
R1a1a1b1a2b-CTS1211	8		1	4	3	4	1	1	2
R1b1a1a2a1a1-M405	1			1		1	1
R1b1a1a2a1a2-P312	1		1			0
Data presented in detail in Figure 2A.
Supplementary file 5. b. Enrichment of Y-chromosomal lineage R1a1a1b1a1a-M458 in men carrying gr/gr deletion
Underhill et al 2015			This study
Estonian population sample			all gr/gr	gr/gr deletion carriers representing R1a1a1b1a1a-M458 and its sublineages (n)			Observed vs expected
total sample size (n)	M458 (n)	Prevalence of M458 (%)	gr/gr deletion carriers typed for Y haplogroup (n)	expected for the population prevalence 5.1% (n)	observed M458 and its sublineages (n)	Prevalence of M458 (%)	Fisher's exact test P-value	OR [95% CI]
236	12	0.0508475	44	2.244	10	0.227273	P = 0.00053	5.5 [2.2-13.7]
The gr/gr deletion carrying patient with cryptozoospermia affiliated to R1a1a1-M417, the broader Y lineage, where R1a1a1b1a1a-M458 belongs, was not included into this enrichment analysis.
Reference: Underhill PA, Poznik GD, Rootsi S, Järve M, Lin AA, Wang J, Passarelli B, Kanbar J, Myres NM, King RJ, Di Cristofaro J, Sahakyan H, Behar DM, Kushniarevich A, Sarac J, Saric T, Rudan P, Pathak AK, Chaubey G, Grugni V, Semino O, Yepiskoposyan L, Bahmanimehr A, Farjadian S, Balanovsky O, Khusnutdinova EK, Herrera RJ, Chiaroni J, Bustamante CD, Quake SR, Kivisild T, Villems R. The phyloge…
