# Supplementary material for: A common 1.6 mb Y-chromosomal inversion predisposes to subsequent deletions and severe spermatogenic failure in humans
Source: eLife. 2021 Mar 30;10:e65420. doi: 10.7554/eLife.65420 (PMC8009663; doi:10.7554/eLife.65420)
Supplement: Supplementary file 6. [file elife-65420-supp6.xlsx]

## Sheet: Sheet1
Supplementary file 6. Y haplogroup distribution of the Estonian patients with idiopathic spermatogenic impairment and reference cases with Y chromosomes having lost the b2/b3 deletion marker sY1191
Haplogroup N3 sub-lineages were defined in more detail for 434 re-sequenced samples (380 patients and 53 reference subjects) using 16 phylogenetic markers from the Illumina MiSeq dataset
	Idiopathic patients with spermatogenic impairment carrying the b2/b3 deletion						Partners of pregnant women
Y lineage and terminal marker	Total n=382	%	Azoospermia (n=29)	Cryptozoo-spermia (n=26)	Severe oligozoo-spermia (n=109)	Moderate oligozoo-spermia (n=218)	n=54 *	%	All analysed men	%
N3-M46(xN3a3,N3a4)	2	0.0052356			1	1	0	0	2	0.00458716
N3a3-VL29	7	0.0183246		1		6	2	0.037037	9	0.0206422
N3a3a-Z4915	6	0.0157068	1		2	3	0	0	6	0.0137615
N3a3a-B215	82	0.21466	12	5	19	46	8	0.148148	90	0.206422
N3a3a-B601	84	0.219895	5	9	27	43	12	0.222222	96	0.220183
N3a3a-L550	26	0.0680628	1	1	8	16	5	0.0925926	31	0.0711009
N3a3b-B190	29	0.0759162	1	1	10	17	3	0.0555556	32	0.0733945
N3a3b-B613	26	0.0680628		2	6	18	4	0.0740741	30	0.0688073
N3a3b-B614	41	0.10733	3	4	11	23	8	0.148148	49	0.112385
N3a3b-F467	1	0.0026178				1	0	0	1	0.00229358
N3a3b-VL39	3	0.0078534			2	1	2	0.037037	5	0.0114679
N3a4-B535	8	0.0209424	2		3	3	2	0.037037	10	0.0229358
N3a4-B536	7	0.0183246	2		1	4	2	0.037037	9	0.0206422
N3a4-B630	19	0.0497382		3	4	12	2	0.037037	21	0.0481651
N3a4-VL62	22	0.0575916	2		11	9	1	0.0185185	23	0.0527523
N3a4-Z1941	17	0.0445026			3	14	2	0.037037	19	0.043578
R1a1a1b1a1a1c-CTS11962.1	1	0.0026178			1**		1	0.0185185	2	0.00458716
K-M9 (xN3-Tat,R1a1a-M198)	1	0.0026178				1	0	0	1	0.00229358
* For the reference subjects, detailed Y-lineages of the b2/b3 deletion carriers were determined for 54 men in the subgroup 'Partners of pregnant women', who had been included into the re-sequencing at the Illumina platform.
Only N3-M46 marker was typed to determine the Y haplogroup in other b2/b3 cases in the subgroup 'Parters of pregnant women' (additional 68 N3 lineage chromosomes detected; in total, 122 of 123 carriers of the b2/b3 deletion with N3) and for the subjects in 'Young men cohort' (139/141 Y-chromosomes with b2/b3 determined as N3-haplogroup).
** r2/r3 inversion + loss of b2/b3 deletion marker sY1191, but no deleted DAZ genes
