# Supplementary material for: A common 1.6 mb Y-chromosomal inversion predisposes to subsequent deletions and severe spermatogenic failure in humans
Source: eLife. 2021 Mar 30;10:e65420. doi: 10.7554/eLife.65420 (PMC8009663; doi:10.7554/eLife.65420)
Supplement: Supplementary file 7. [file elife-65420-supp7.xlsx]

## Sheet: Sheet1
Supplementary file 7. Retained DAZ, BPY2 and CDY1 copy numbers on the Y chromosomes with either gr/gr deletion or having lost the b2/b3 deletion marker sY1191
I. Samples carrying the gr/gr deletion
DAZ copies	BPY2 copies	CDY1 copies	Patients n=31 (%)	Controls n=13 (%)	Total n=44 (%)	Comment
2	2	1	27 (87.1%)	10 (76.9%)	37 (84.1%)	initial gr/gr deletion
4	4	2	2 (6.5%)	0	2 (4.5%)	gr/gr deletion + secondary b2/b4 duplication
6	6	3	1 (3.2%)	2 (15.4%)	3 (6.8%)	gr/gr deletion + secondary b2/b4 duplication
8	8	4	0	1 (7.7%)	1 (2.3%)	gr/gr deletion + secondary b2/b4 duplication
4	3	1	1 (3.2%)	0	1 (2.3%)
II. Haplogroup N samples carrying the b2/b3 deletion
DAZ copies	BPY2 copies	CDY1 copies	Patients n=380 (%)	Controls n=246 (%)	Total n=626 (%)	Comment
2	1	1	300 (78.9%)	210 (85.4%)	510 (81.5%)	initial b2/b3 deletion
4	2	2	74 (19.5%)	33 (13.3%)	107 (17.1%)	b2/b3 deletion + secondary b2/b4 duplication
6	3	3	2 (0.53%)	1 (0.41%)	3 (0.48%)	b2/b3 deletion + secondary b2/b4 duplication
8	4	4	1 (0.26%)	0	1 (0.16%)	b2/b3 deletion + secondary b2/b4 duplication
2	1	2	1 (0.26%)	0	1 (0.16%)
3	1	1	1 (0.26%)	0	1 (0.16%)
5	3	3	1 (0.26%)	0	1 (0.16%)
3	3	2	0	1 (0.41%)	1 (0.16%)
4	2	1	0	1 (0.41%)	1 (0.16%)
III. Non-N haplogroup samples having lost the b2/b3 deletion marker sY1191
DAZ copies	BPY2 copies	CDY1 copies	Patients n=2	Controls n=3	Total n=5	Comment
6	3	3	1	0	1	b2/b3 deletion + secondary b2/b4 duplication
6	4	3	1	0	1	r2/r3 inversion + loss of b2/b3 deletion marker sY1191, but no deleted DAZ genes
4	2	2	0	1	1	r2/r3 inversion + b2/b3 deletion and secondary b2/b4 duplication
3	1	2	0	1	1
4	2	3	0	1	1
Secondary 'b2/b4' duplication events add one or multiple gene sets of [2 DAZ, 2 BPY and 1 CDY1] following gr/gr deletion, or [2 DAZ, 1 BPY and 1 CDY1] following b2/b3 deletion
