# Supplementary material for: A common 1.6 mb Y-chromosomal inversion predisposes to subsequent deletions and severe spermatogenic failure in humans
Source: eLife. 2021 Mar 30;10:e65420. doi: 10.7554/eLife.65420 (PMC8009663; doi:10.7554/eLife.65420)
Supplement: Supplementary file 8. [file elife-65420-supp8.xlsx]

## Sheet: Sheet1
Supplementary file 8. Structural variants present in gnomAD SV database (v2.1, RRID:SCR_014964) and overlapping with the current study
	gnomAD SV ID	Size	Genomic coordinate (GRCh37/hg19)	Genomic coordinate (GRCh38)	Genes	Description	Info	East Asian	African/African-American	European	Latino	Other	Total (males)
I.	DUP_Y_55084	2,105,101 bp	chrY:24825999-26931100	chrY:22679852-24784953	BPY2A, BPY2B, CDY1A, DAZ1, DAZ2	b2/b4 duplication following gr/gr deletion	Allele Count	24	60	21	7	2	114
							Allele Number	694	2615	1701	480	38	5528
							Allele Frequency	0.03458	0.02294	0.01235	0.01458	0.05263	0.02062
II.	DUP_Y_55085	1,589,100 bp	chrY:24826000-26415100	chrY:22679853-24268953	BPY2A, CDY1A, DAZ1, DAZ2	b2/b4 duplication following b2/b3 deletion	Allele Count	13	27	14	3	1	58
							Allele Number	584	2488	1564	442	37	5115
							Allele Frequency	0.02226	0.01085	0.008951	0.006787	0.02703	0.01134
