# Supplementary material for: A common 1.6 mb Y-chromosomal inversion predisposes to subsequent deletions and severe spermatogenic failure in humans
Source: eLife. 2021 Mar 30;10:e65420. doi: 10.7554/eLife.65420 (PMC8009663; doi:10.7554/eLife.65420)
Supplement: Supplementary file 9. [file elife-65420-supp9.xlsx]

## Sheet: Sheet1
Supplementary file 9. Retained DAZ, BPY2 and CDY1 copy numbers according to Y lineage in samples having lost the b2/b3 deletion marker sY1191
		Copy numbers of retained DAZ–BPY2–CDY1 genes
	Idiopathic patients with spermatogenic impairment carrying the b2/b3 deletion									Analyzed reference men carrying the b2/b3 deletion*
		Major subtypes		Rare subtypes							Major subtypes		Rare subtype
	Total (n=382)	2–1–1	4–2–2	6–3–3	8–4–4	2–1–2	3–1–1	5–3–3	6–4–1	Total (n=54)	2–1–1	4–2–2	6–3–3
Y lineage/ 'b2/b3' deletion subtype		1	2	3	4	5	6	7	8		1	2	3
N (Tat)	2	2								0
N3a4-B535	8	7	1							2	1	1
N3a4-VL62	22	20	1					1		1	1
N3a4-Z1941	17	17								2	2
N3a4-B630	19	19								2	2
N3a4-B536	7	7								2	2
N3a3-VL29	7	5	2							2	2
N3a3a-L550*	26	19	6			1				5	4	1
N3a3a-B215*	82	66	14	1			1			8	7	1
N3a3a-B601	84	51	32	1						12	6	5	1
N3a3a_Z4915	6	4	2							0
N3a3b-VL39	3	3								2	1	1
N3a3b-B613	26	21	5							4	4
N3a3b-B614	41	32	8		1					8	6	2
N3a3b-B190	29	26	3							3	1	2
N3a3b-F467	1	1								0
R1a1a1b1a1a1c-CTS11962.1	1								1**	1		1
K-M9 (xTat,R1a1a)	1			1						0
Typical b2/b3 deletion chromosome [2-1-1] carries 2 DAZ, 1 BPY2, 1 CDY1 and also 2 CDY2 genes
secondary 'b2/b4' duplication events add one or multiple gene sets of [2 DAZ, 1 BPY and 1 CDY1].
*detailed Y lineages of the b2/b3 deletion carriers were determined for 54 men in the subgroup 'Partners of pregnant women', who had been included into the re-sequencing at the Illumina platform.
** r2/r3 inversion + loss of b2/b3 deletion marker sY1191, but no deleted DAZ genes
