# Supplementary material for: A common 1.6 mb Y-chromosomal inversion predisposes to subsequent deletions and severe spermatogenic failure in humans
Source: eLife. 2021 Mar 30;10:e65420. doi: 10.7554/eLife.65420 (PMC8009663; doi:10.7554/eLife.65420)
Supplement: Supplementary file 10. [file elife-65420-supp10.xlsx]

## Sheet: Sheet1
Supplementary file 10. Deleted DAZ and CDY1 gene types in gr/gr and b2/b3 carriers
a. Missing DAZ and CDY1 genes in gr/gr deletion chromosomes
	gr/gr deletion defined based on missing marker sY1291
I. Deleted DAZ genes	Patients (n=31)	Reference men (n=13)	Total (n=44)	Krausz et al 2009 (n=153)
DAZ1/DAZ2	18 (58.1%)	11 (84.6%)	29 (65.9%)	67.4%
DAZ3/DAZ4	4 (12.9%)	0 (0%)	4 (9.1%)	32.6%
DAZ2/DAZ4	8 (25.8%)	2 (15.4%)	10 (22.7%)	not reported
DAZ1/DAZ3	1 (3.2%)	0 (0%)	1 (2.3%)	not reported
Deleted DAZ pairs and CDY1 gene	Patients (n=30)*	Reference men (n=13)	Total (n=43)	Krausz et al 2009 (n=153)
DAZ1/2-CDY1a (subtype 1 by Krausz et al 2009)	11 (36.7%)	7 (53.8%)	18 (41.9%)	42.5%
DAZ3/4-CDY1a (subtype 2 by Krausz et al 2009)	3 (10.0%)	0	3 (7.0%)	24.2%
DAZ1/3-CDY1a	1 (3.3%)	0	1 (2.3%)	not reported
DAZ2/4-CDY1a	4 (13.3%)	1 (7.7%)	5 (11.6%)	not reported
DAZ1/2-CDY1b (subtype 3 by Krausz et al 2009)	7 (23.3%)	4 (30.8%)	11 (25.6%)	0.255
DAZ3/4-CDY1b (subtype 4 by Krausz et al 2009)	1 (3.3%)	0	1 (2.3%)	0.078
DAZ2/4-CDY1b	3 (10.0%)	1 (7.7%)	4 (9.3%)	not reported
* - one patient was excluded from the typing due to DNA quantity restictions
Reference: Krausz C, Giachini C, Xue Y, O'Bryan MK, Gromoll J, Rajpert-de Meyts E, Oliva R, Aknin-Seifer I, Erdei E, Jorgensen N et al. (2009) Phenotypic variation within European carriers of the Y-chromosomal gr/gr deletion is independent of Y-chromosomal background. J Med Genet 46:21-31
b. Missing DAZ and CDY1 genes in b2/b3 deletion chromosomes
	b2/b3 deletion defined based on missing marker sY1191
I. Deleted DAZ genes	Patients (n=382)	Reference men (n=54)	Total (n=436)	Comment
None	1 (0.3%)	0	1 (0.2%)	r2/r3 inversion + loss of b2/b3 deletion marker sY1191, but no deleted DAZ genes
DAZ1/DAZ2	0	0	0
DAZ3/DAZ4	381 (99.7%)	53 (98.1%)	434 (99.6%)
DAZ2/DAZ4	0	0	0
DAZ1/DAZ3	0	1 (1.9%)	1 (0.2%)	r2/r3 inversion + b2/b3 deletion and secondary 'b2/b4' duplication
Upon the major deletion event model, the carriers of the b2/b3 deletion miss CDY1a (see Figure 1-figure supplement 1)
