# Supplementary material for: A common 1.6 mb Y-chromosomal inversion predisposes to subsequent deletions and severe spermatogenic failure in humans
Source: eLife. 2021 Mar 30;10:e65420. doi: 10.7554/eLife.65420 (PMC8009663; doi:10.7554/eLife.65420)
Supplement: Supplementary file 11. [file elife-65420-supp11.xlsx]

## Sheet: Sheet1
Supplementary file 11. Detailed copy number, deletion type and Y haplogroup information for samples carrying the gr/gr deletion
I. Idiopathic patients with spermatogenic failure with gr/gr deletion			Copy numbers			Deleted genes
ID	Level of spermatogenic impairment/Reference group	Y haplogroup	DAZ	BPY2	CDY1	DAZ copies	CDY1 gene	DAZ4 exon 7 deletion	Additional genomic rearrangement	Comment
EE01	moderate oligozoospermia	A1b-P108	2	2	1	DAZ1, DAZ2	CDY1b		no
EE02	severe oligozoospermia	I1a1-CTS6364	2	2	1	DAZ1, DAZ2	CDY1b	7F deletion	no
EE03	moderate oligozoospermia	I1a1-CTS6364	2	2	1	DAZ1, DAZ2	CDY1b	7F deletion	no
EE04	moderate oligozoospermia	I1a2-S244	6	6	3	DAZ1, DAZ2	CDY1b	7F deletion	Secondary 'b2/b4' duplication	'likely benign' as high frequency in the reference group
EE05	moderate oligozoospermia	I1a2-S244	2	2	1	DAZ1, DAZ2	CDY1b	7F deletion	no
EE06	moderate oligozoospermia	I1a2-S244	2	2	1	DAZ1, DAZ2	CDY1b	7F deletion	no
EE07	moderate oligozoospermia	I2a1b1a-CTS616	4	4	2	DAZ1, DAZ2	CDY1a		Secondary 'b2/b4' duplication	'likely benign' as high frequency in the reference group
EE08	moderate oligozoospermia	J-M304	2	2	1	DAZ1, DAZ2	CDY1b		no
EE09	azoospermia	J2b2a-L283	2	2	1	DAZ3, DAZ4	CDY1a		no
EE10	moderate oligozoospermia	J2b2a-L283	2	2	1	DAZ3, DAZ4	CDY1a		no
EE11	cryptozoospermia	R1a1a1-M417	2	2	1	DAZ2, DAZ4	CDY1a		Past 'r2/r3' inversion
EE12	severe oligozoospermia	R1a1a1b1a1a-M458	2	2	1	DAZ2, DAZ4	CDY1a		Past 'r2/r3' inversion
EE13	severe oligozoospermia	R1a1a1b1a1a1a-L260	4	4	2	DAZ1, DAZ3	CDY1a		Past 'r2/r3' inversion & secondary 'b2/b4' duplication
EE14	azoospermia	R1a1a1b1a1a1c-CTS11962.1	2	2	1	DAZ2, DAZ4	CDY1a		Past 'r2/r3' inversion
EE15	moderate oligozoospermia	R1a1a1b1a1a1c1-L1029	2	2	1	DAZ2, DAZ4	CDY1b		Past 'r2/r3' inversion
EE16	cryptozoospermia	R1a1a1b1a1a1c1-L1029	2	2	1	DAZ2, DAZ4	n.d.		Past 'r2/r3' inversion
EE17	severe oligozoospermia	R1a1a1b1a1a1c1a-YP263	2	2	1	DAZ2, DAZ4	CDY1a		Past 'r2/r3' inversion
EE18	severe oligozoospermia	R1a1a1b1a1a1c1c-YP417	2	2	1	DAZ2, DAZ4	CDY1b		Past 'r2/r3' inversion
EE19	cryptozoospermia	R1a1a1b1a1a1c1c-YP417	2	2	1	DAZ2, DAZ4	CDY1b		Past 'r2/r3' inversion
EE20	severe oligozoospermia	R1a1a1b1a2a-Z92	2	2	1	DAZ1, DAZ2	CDY1a	7Y deletion	no
EE21	moderate oligozoospermia	R1a1a1b1a2a-Z92	2	2	1	DAZ3, DAZ4	CDY1a		no
EE22	moderate oligozoospermia	R1a1a1b1a2b-CTS1211	2	2	1	DAZ1, DAZ2	CDY1a	7Y deletion	no
EE23	severe oligozoospermia	R1a1a1b1a2b-CTS1211	2	2	1	DAZ1, DAZ2	CDY1a	7Y deletion	no
EE24	severe oligozoospermia	R1a1a1b1a2b-CTS1211	2	2	1	DAZ1, DAZ2	CDY1a	7Y deletion	no
EE25	severe oligozoospermia	R1a1a1b1a2b-CTS1211	2	2	1	DAZ1, DAZ2	CDY1a	7Y deletion	no
EE26	cryptozoospermia	R1a1a1b1a2b-CTS1211	2	2	1	DAZ1, DAZ2	CDY1a	7Y deletion	no
EE27	severe oligozoospermia	R1a1a1b1a2b-CTS1211	2	2	1	DAZ1, DAZ2	CDY1a	7Y deletion	no
EE28	moderate oligozoospermia	R1a1a1b1a2b-CTS1211	2	2	1	DAZ1, DAZ2	CDY1a	7Y deletion	no
EE29	moderate oligozoospermia	R1a1a1b1a2b-CTS1211	2	2	1	DAZ1, DAZ2	CDY1a	7Y deletion	no
EE30	severe oligozoospermia	R1b1a1a2a1a1-M405	2	2	1	DAZ3, DAZ4	CDY1b		no
EE31	cryptozoospermia	R1b1a1a2a1a2-P312	4	3	1	DAZ1, DAZ2	CDY1a		Atypical rearrangements not consistent with 'b2/b4' duplication
II. Reference individuals with gr/gr deletion
EE32	Estonian young men cohort	R1a1a1b1a1a1a-L260	2	2	1	DAZ2, DAZ4	CDY1b		Past 'r2/r3' inversion
EE33	Estonian young men cohort	I1-M253	2	2	1	DAZ1, DAZ2	CDY1b	7F deletion	no
EE34	Estonian young men cohort	I1a2-S244	6	6	3	DAZ1, DAZ2	CDY1b	7F deletion	Secondary 'b2/b4' duplication	'likely benign' as high frequency in the reference group
EE35	Estonian young men cohort	R1a1a1b1a2a-Z92	2	2	1	DAZ1, DAZ2	CDY1a	7Y deletion	no
EE36	Estonian young men cohort	R1a1a1b1a2b-CTS1211	2	2	1	DAZ1, DAZ2	CDY1a	7Y deletion	no
EE37	Partners of pregnant women	R1b1a1a2a1a1-M405	2	2	1	DAZ1, DAZ2	CDY1a		no
EE38	Partners of pregnant women	R1a1a1b1a2b-CTS1211	2	2	1	DAZ1, DAZ2	CDY1a	7Y deletion	no
EE39	Partners of pregnant women	G-M201	2	2	1	DAZ1, DAZ2	CDY1a		no
EE40	Partners of pregnant women	J-M304	8	8	4	DAZ1, DAZ2	CDY1a		Secondary 'b2/b4' duplication	'likely benign' as high frequency in the reference group
EE42	REPROMETA proven fathers	I2a1b1a-CTS616	6	6	3	DAZ1, DAZ2	CDY1b		Secondary 'b2/b4' duplication	'likely benign' as high frequency in the reference group
EE44	REPROMETA proven fathers	R1a1a1b1a2b_CTS1211	2	2	1	DAZ1, DAZ2	CDY1b	n.d.	no
EE41	REPROMETA proven fathers	R1a1a1b1a1a1a1a3_YP414	2	2	1	DAZ2, DAZ4	CDY1a		Past 'r2/r3' inversion
EE43	REPROMETA proven fathers	R1a1a1b1a2b_CTS1211	2	2	1	DAZ1, DAZ2	CDY1a	n.d.	no
n.d. - not determined
