# Supplementary material for: A common 1.6 mb Y-chromosomal inversion predisposes to subsequent deletions and severe spermatogenic failure in humans
Source: eLife. 2021 Mar 30;10:e65420. doi: 10.7554/eLife.65420 (PMC8009663; doi:10.7554/eLife.65420)
Supplement: Supplementary file 12. [file elife-65420-supp12.xlsx]

## Sheet: Sheet1
Supplementary file 12. Andrological parameters of 10 patients and two reference cases with 'r2/r3' inversion plus gr/gr, b2/b3 or complex deletion
				Copy numbers			Deleted genes
ID from Supplementary file 11	Level of spermatogenic impairment/Reference group	Y haplogroup	AZFc deletion type	DAZ	BPY2	CDY1	DAZ copies	CDY1 gene	Additional genomic rearrangement	Age (years)	BMI (kg/m2)	Total testis volume (ml)	Semen volume (ml)	Sperm concentration (million/ml)	Total sperm count (million/ejaculate)	Progressive motility (A+B) (%)	Normal morphology (%)	FSH (IU/L)	LH (IU(L)	Total testosterone (nmol/L)
EE11	cryptozoospermia	R1a1a1-M417	gr/gr	2	2	1	DAZ2, DAZ4	CDY1a	Past 'r2/r3' inversion	36.87	NA	46	1.9	0.1	0.19	15	0	26	6	17
EE12	severe oligozoospermia	R1a1a1b1a1a-M458	gr/gr	2	2	1	DAZ2, DAZ4	CDY1a	Past 'r2/r3' inversion	26.28	29.7	40	2.4	0.9	2.2	34	5	3.3	2.64	22.96
EE13	severe oligozoospermia	R1a1a1b1a1a1a-L260	gr/gr	4	4	2	DAZ1, DAZ3	CDY1a	Past 'r2/r3' inversion & secondary 'b2/b4' duplication	35.86	20.4511	35	1.7	1.4	2.38	1	0	7.3	7.53	31.9
EE14	azoospermia	R1a1a1b1a1a1c-CTS11962.1	gr/gr	2	2	1	DAZ2, DAZ4	CDY1a	Past 'r2/r3' inversion	37.95	26.2	32	7.5	0	0	0	n.a.	41.8	11.01	24.99
EE15	moderate oligozoospermia	R1a1a1b1a1a1c1-L1029	gr/gr	2	2	1	DAZ2, DAZ4	CDY1b	Past 'r2/r3' inversion	27.1	27.7551	33	2.7	13	35.1	12	1	5.76	3.53	25
EE16	cryptozoospermia	R1a1a1b1a1a1c1-L1029	gr/gr	2	2	1	DAZ2, DAZ4	n.d.	Past 'r2/r3' inversion	29.95	25.4017	22	4.4	0.2	0.886	3	0	10.5	6.32	24.5
EE17	severe oligozoospermia	R1a1a1b1a1a1c1a-YP263	gr/gr	2	2	1	DAZ2, DAZ4	CDY1a	Past 'r2/r3' inversion	32.12	32.6	50	0.8	8	6.4	17	0	1.9	4.29	7.59
EE18	severe oligozoospermia	R1a1a1b1a1a1c1c-YP417	gr/gr	2	2	1	DAZ2, DAZ4	CDY1b	Past 'r2/r3' inversion	50.82	30.2	28	1.7	1	1.7	25	3	26	11.32	22.58
EE19	cryptozoospermia	R1a1a1b1a1a1c1c-YP417	gr/gr	2	2	1	DAZ2, DAZ4	CDY1b	Past 'r2/r3' inversion	30.75	27.7489	29	3.7	0.09	0.333	0	2	16	4.65	19.3
n.a.	severe oligozoospermia	R1a1a1b1a1a1c-CTS11962.1	lost b2/b3 deletion marker sY1191, but no deleted DAZ genes	6	4	3	none	n.d.	Past 'r2/r3' inversion, loss of b2/b3 deletion marker sY1191 & secondary complex duplication	32.63	33.4	34	2.1	3.4	7.276	14	5	6.64	3.84	12.9
EE32	Estonian young men cohort	R1a1a1b1a1a1a-L260	gr/gr	2	2	1	DAZ2, DAZ4	CDY1b	Past 'r2/r3' inversion	17.9904	21.276	53	2	97.9592	195.918	44	20	3.69	3.58	25.9
n.a.	Partners of pregnant women	R1a1a1b1a1a1c-CTS11962.1	b2/b3	4	2	2	DAZ1, DAZ3	n.d.	Past 'r2/r3' inversion & secondary 'b2/b4' duplication	23	20	39	3.28	12*	39.36*	56	11	3.8	1.6	17.7
* This man was recruited in the study gorup 'Partners of pregnant women'; however, his sperm concentration 12 x 106/ml was below normozoospermia threshold (<15 x 106/ml) and his sperm counts 39.36 x 106 were at the borderline of moderate oligozoospermia defined as >10 – 39 x 106/ejaculate)
n.a. - not applicable
