# Supplementary material for: A common 1.6 mb Y-chromosomal inversion predisposes to subsequent deletions and severe spermatogenic failure in humans
Source: eLife. 2021 Mar 30;10:e65420. doi: 10.7554/eLife.65420 (PMC8009663; doi:10.7554/eLife.65420)
Supplement: Supplementary file 13. [file elife-65420-supp13.xlsx]

## Sheet: Sheet1
Supplementary file 13. Summary of genetic variation identified on the Y chromosomes with AZFc region rearrangements (n=476)
	Re-sequenced genes
	DAZ1	DAZ2	DAZ3	DAZ4	BPY2	CDY1	CDY2	Total
Total bp sequenced	18792	26579	14410	25019	3485	2940	2963	94188
Large deletions of whole exons identified	0	0	0	2	0	0	0	2
Short (<10bp) indels identified	3	3	2	2	0	0	0	10
SNVs identified	23	21	8	8	3	2	1	66
Indels/kb	0.159642	0.112871	0.138793	0.159878	0	0	0
SNVs/kb	1.22393	0.790097	0.55517	0.319757	0.860832	0.680272	0.337496
Minimum variants/sample	0	0	0	0	0	0	0
Maximum variants/sample	2	2	2	2	2	1	1
Mean variants/sample	1.0021	0.997899	0.0588235	0.0588235	0.915966	0.0547368	0.00630252
Median variants/sample	1	1	0	0	1	0	0
See Supplementary file 14 for details
