# Supplementary material for: A common 1.6 mb Y-chromosomal inversion predisposes to subsequent deletions and severe spermatogenic failure in humans
Source: eLife. 2021 Mar 30;10:e65420. doi: 10.7554/eLife.65420 (PMC8009663; doi:10.7554/eLife.65420)
Supplement: Supplementary file 14. [file elife-65420-supp14.xlsx]

## Sheet: Sheet1
Supplementary file 14. Identified SNVs and indels from re-sequencing of retained DAZ, BPY2 and CDY genes on theY-chromosomes with AZFc region rearrangements
Variant number	Sampleset	Gene*	n	Variation	Location	Genomic coordinates on chrY (GRCh38)	SIFT	PolyPhen	CADD phred	Comments	rs number
1	gr/gr-carriers	CDY1b	26	G/A	5’UTR	CDY1b:24047772			4.996		rs1556277927
		CDY1a		C/T		CDY1a:25622359			4.664		rs1556284587
2	gr/gr-carriers	DAZ3	1	ATAAAGC/A	5'UTR	DAZ3:24815282			n.a.
		DAZ4		AGCTTTA/A		DAZ4:24832023			n.a.
3	gr/gr-carriers	DAZ3	1	G/A	downstream	DAZ3:24763056			7.837
		DAZ4		C/T		DAZ4:24907053			7.785
4	gr/gr-carriers	DAZ3	1	C/G	intron	DAZ3:24786479, DAZ3:24795992			2.084; 2.421
		DAZ4		G/C		DAZ4:24871705, DAZ4:24862168, DAZ4:24866948			1.964; 1.309; 1.436
5	gr/gr-carriers	DAZ3	2	C/T	intron	DAZ3:24800738			1.641	shared by two I1a2-S244 samples
		DAZ4		G/A		DAZ4:24857422			1.142
6	gr/gr-carriers	DAZ3	1	T/C	intron	DAZ3:24803396			6.579
		DAZ4		A/G		DAZ4:24854764			7.412
7	gr/gr-carriers	DAZ3	1	C/T (caG/caA)	splice_region_variant (DAZ3: c166; DAZ4: c166, 331; Gln>Gln)	DAZ3:24804728			14.26
		DAZ4		G/A		DAZ4:24853432, DAZ4:24842584			17.28; 10.16
8	gr/gr-carriers	DAZ3	1	AGT/A	intron	DAZ3:24805356			n.a.
		DAZ4		CAC/C		DAZ4:24841953, DAZ4:24852801			n.a.
9	gr/gr-carriers	DAZ4	1	A/G	intron	DAZ4:24844153			13.22
10	gr/gr-carriers	DAZ4	7	Deletion of 7F exons	Coding	DAZ4:24864256-24864722			n.a.	specific to haplogroup I1 and its sublineages
11	gr/gr-carriers	DAZ4	12	Deletion of 7Y exons	Coding	DAZ4:24893113-24893579, DAZ4:24890728-24891194, DAZ4:24888344-24888810, DAZ4:24885959-24886425, DAZ4:24883574-24884040			n.a.	specific to haplogroup R1a1a1b1a2 and its sublineages
12	gr/gr-carriers	DAZ1	1	AAAG/A	3’UTR	DAZ1:23129865			n.a.
		DAZ2		TCTT/T		DAZ2:23290842			n.a.
13	gr/gr-carriers	DAZ1	1	A/C	3’UTR	DAZ1:23130147			4.577
		DAZ3		A/C		DAZ3:24763861			4.263
14	gr/gr-carriers	DAZ1	21	C/T	3’UTR	DAZ1:23131195			15.25
		DAZ2		G/A		DAZ2:23289516			15.12
		DAZ3		C/T		DAZ3:24764909			15.36
		DAZ4		G/A		DAZ4:24905200			15.02
15	b2/b3-carriers	BPY2	433	G/A	5' UTR	BPY2:22973924			3.274	Shared by haplogrup N3 samples
16	b2/b3-carriers	BPY2	1	C/T	3' UTR	BPY2:23004955			2.604	Single hgN sample
17	b2/b3-carriers	BPY2	1	A/G	3' UTR/downstream	BPY2:23005431			0.967	Single hgN sample
18	b2/b3-carriers	CDY1b	1	C/A (aCc/aAc)	Coding (c419, Thr>Asn)	CDY1:25623698	deleterious(0.01)	benign(0.233)	16.1	Specific to haplogroup K-M9 sample
19	b2/b3-carriers	CDY2a	3	G/T	3' UTR/downstream	CDY2a:18028528			6.648	Shared by three N3a3a-B601 samples
		CDY2b		C/A		CDY2b:17877479			6.438
20	b2/b3-carriers	DAZ1	1	C/T	upstream	DAZ1:23200716			9.951	Single hgN sample
		DAZ2		G/A		DAZ2:23217825			13.39
21	b2/b3-carriers	DAZ1	1	C/A	upstream	DAZ1:23199938			5.248	Single hgN sample
		DAZ2		G/T		DAZ2:23218603			4.419
22	b2/b3-carriers	DAZ1	1	G/T	5'UTR	DAZ1:23199012			13.35	Single hgN sample
		DAZ2		C/A		DAZ2:23219529			13.26
23	b2/b3-carriers	DAZ1	1	A/C	intron	DAZ1:23170222, DAZ1:23181062, DAZ1:23191910			3.103; 3.388; 3.841	Single hgN sample
		DAZ2		T/G		DAZ2:23226632			3.925
24	b2/b3-carriers	DAZ1	2	T/A	intron	DAZ1:23169950, DAZ1:23180790, DAZ1:23191638			1.009; 1.402; 1.449	Shared by two N3a4-Z1941 samples
		DAZ2		A/T		DAZ2:23226904			3.369
25	b2/b3-carriers	DAZ1	1	T/C	intron	DAZ1:23169511, DAZ1:23180351, DAZ1:23191199			6.543; 6.455; 6.513	Single hgN sample
		DAZ2		A/G		DAZ2:23227343			6.872
26	b2/b3-carriers	DAZ1	1	A/C	intron	DAZ1:23178102, DAZ1:23188950			14.31; 14.24	Single hgN sample
27	b2/b3-carriers	DAZ1	1	TCAAG/T	intron	DAZ1:23167110			n.a.	Specific to haplogroup K-M9 sample
		DAZ2		CTTGA/A		DAZ2:23229740			n.a.
28	b2/b3-carriers	DAZ1	1	G/A (Cat/Tat)	Coding (DAZ1:c173,221,503, DAZ2:c173, His>Tyr)	DAZ1:23167238	tolerated_low_confidence(0.14-0.82)	benign(0.018-0.134); possibly_damaging(0.457)	15.59	Single hgN sample
		DAZ2		C/T (Cat/Tat)		DAZ2:23229616	tolerated_low_confidence(0.13-0.45); tolerated(0.33-0.4)	benign(0.055-0.444)	15.99
29	b2/b3-carriers	DAZ1	430	A/C	intron	DAZ1:23139745			0.647	Specific to haplgroup N samples, evidence of gene conversion
		DAZ2		T/G		DAZ2:23280965			0.94
30	b2/b3-carriers	DAZ1	3	A/G	intron	DAZ1:23139956			5.87	Shared by three N3a4-Z1941 samples
		DAZ2		T/C		DAZ2:23280754			4.111
31	b2/b3-carriers	DAZ1	1	T/G	intron	DAZ1:23138332			7.173	Single hgN sample
		DAZ2		A/C		DAZ2:23282378			3.11
32	b2/b3-carriers	DAZ1	1	C/T	3'UTR	DAZ1:23131195			15.25	Present in the R1a1a1b1a1a1c-CTS11962.1 sample retaining all DAZ genes
		DAZ2		G/A		DAZ2:23289516			15.12
		DAZ3		C/T		DAZ3:24764909			15.36
		DAZ4		G/A		DAZ4:24905200			15.02
33	b2/b3-carriers	DAZ1	1	T/G	3'UTR	DAZ1:23131075			13.73	Single hgN sample
		DAZ2		A/C		DAZ2:23289636			13.85
34	b2/b3-carriers	DAZ1	1	CTG/C	3'UTR	DAZ1:23130077			n.a.	Specific to haplogroup K-M9 sample
		DAZ2		ACA/A		DAZ2:23290631			n.a.
35	b2/b3-carriers	DAZ1	1	A/C	3'UTR	DAZ1:23129901			4.577	Single hgN sample
		DAZ2		T/G		DAZ2:23290810			5.977
36	b2/b3-carriers	DAZ1	1	G/C	3'UTR	DAZ1:23129836			4.643	Single hgN sample
		DAZ2		C/G		DAZ2:23290875			4.632
37	b2/b3-carriers	DAZ1	1	T/C	3'UTR	DAZ1:23129646			1.697	Single hgN sample
		DAZ2		A/G		DAZ2:23291065			2.601
38	b2/b3-carriers	DAZ1	1	G/C (Cag/Gag)	Coding (DAZ1:c262,310,358,592,640, DAZ2:c262,286,310,358, Gln>Glu)	DAZ1:23159955, DAZ1:23155176	tolerated_low_confidence(0.26-033); deleterious_low_confidence(0-0.01)	benign(0-0.34)	16.31; 21.1	Single hgN sample
		DAZ2		C/G (Cag/Gag)		DAZ2:23236897, DAZ2:23241675, DAZ2:23246455	tolerated_low_confidence(0.22-0.57); deleterious_low_confidence(0-0.01)	benign(0-0.217); possibly_damaging(0.899)	17.06; 15.71; 22.8
39	b2/b3-carriers	DAZ1	2	C/G	intron	DAZ1:23152769			3.227	Shared by two N3a3b-B613 samples
		DAZ2		G/C		DAZ2:23248862, DAZ2:23256017			3.096; 1.802
40	b2/b3-carriers	DAZ1	1	T/G	intron	DAZ1:23159839, DAZ1:23155060			6.058; 5.495	Single hgN sample
		DAZ2		A/C		DAZ2:23237013, DAZ2:23241791, DAZ2:23246571, DAZ2:23253726			10.68; 6.666; 7.624; 6.278
41	b2/b3-carriers	DAZ1	1	A/T	intron	DAZ1:23160074, DAZ1:23155295			5.908; 8.463	Single hgN sample
		DAZ2		T/A		DAZ2:23236778, DAZ2:23241556, DAZ2:23246336, DAZ2:23253491			6.641; 7.515; 5.57; 9.618
42	b2/b3-carriers	DAZ1	1	T/C (tAt/tGt)	Coding (DAZ1:c243,267,315,597, DAZ2:c219,267,315, Tyr>Cys)	DAZ1:23157628	deleterious_low_confidence(0-0.02)	benign(0.006); possibly_damaging(0.878); probably_damaging(0.926-0.974)	24.1	Single hgN sample
		DAZ2		A/G (tAt/tGt)		DAZ2:23244003, DAZ2:23239223	tolerated(0.11-0.17); tolerated_low_confidence(0.05-0.17); deleterious_low_confidence(0)	benign(0.015); possibly_damaging(0.759-0.878); probably_damaging(0.99)	22.8; 14.99
* - in most cases it is not possible to determine the exact gene copy where the variant is present due to high DNA sequence similarity. Possible locations are given based on which gene copies are remaining in the sample(s) carrying the variant.
