# Supplementary material for: A common 1.6 mb Y-chromosomal inversion predisposes to subsequent deletions and severe spermatogenic failure in humans
Source: eLife. 2021 Mar 30;10:e65420. doi: 10.7554/eLife.65420 (PMC8009663; doi:10.7554/eLife.65420)
Supplement: Supplementary file 15. [file elife-65420-supp15.xlsx]

## Sheet: Sheet1
Supplementary file 15. Population frequencies of R1a1a1b1a1a-M458 Y lineage and expected proportion of cases with the complex rearrangement r2/r3 inversion + secondary rearrangement among men with sperm counts <10 mill/ejaculate
	Population prevalence by Underhill et al 2015			Subjects with sperm counts <10 million per ejaculate carrying R1a1a1b1a1a-M458 Y chromosome with r2/r3 inversion + secondary deletions(s)
		R1a1a1b1a1a-M458
Population	Sample size (n)	Carriers (n)	Frequency (%)	This study: study subjects with sperm counts <10 million per ejaculate	Estimated or expected proportion of this recurrent AZFc rearrangement
Northern/Western Europe
Estonia	236	12	0.0508475	9 patients of 524 analyzed	0.0171756
Germany	322	15	0.0465839		0.015528
South Sweden	141	3	0.0212766		0.0070922
Netherlands	87	1	0.0114943		0.00383142
Denmark	112	1	0.00892857		0.00297619
The British Isles	259	0	0		n.a.
Norway	118	0	0		n.a.
Switzerland	75	0	0		n.a.
Eastern European Slavic countries, including population minorities
Belorussians	364	56	0.153846		0.0512821
Fenno-Ugric populations in NE Russia	179	25	0.139665		0.0465549
Ukrainians	498	67	0.134538		0.0448461
Russians	433	54	0.124711		0.0415704
Volga-Uralic populations (Maris, Komis, Udmurts, Chuvash, Tatars)	439	6	0.0136674		0.00455581
Central Europe
Czechs	88	23	0.261364		0.0871212
Poland	202	51	0.252475		0.0841584
Slovakia	257	55	0.214008		0.0713359
Austria	19	1	0.0526316		0.0175439
Hungary	113	5	0.0442478		0.0147493
Slovenia	180	4	0.0222222		0.00740741
Southern Europe
Croatia	108	21	0.194444		0.0648148
Bulgaria	808	60	0.0742574		0.0247525
Romania	335	18	0.0537313		0.0179104
North Macedonia	79	3	0.0379747		0.0126582
Serbia	113	4	0.0353982		0.0117994
Greece, including Crete	532	14	0.0263158		0.00877193
Roma groups (Croatia, Serbia, Slovakia, Hungary)	360	8	0.0222222		0.00740741
Bosnia-Herzegovina	219	4	0.0182648		0.00608828
Andalusian Spain	29	0	0		n.a.
Italy	287	0	0		n.a.
Other Eurasian regions
Caucasus	2164	23	0.0106285		0.00354282
Turkey	645	3	0.00465116		0.00155039
Jews (Ashkenazi, non-Ashkenazi, India, Caucasus)	1405	2	0.00142349		n.a.
South- and Central Asia (Pakistan, India, Nepal, Afganistan, Turkmenia, Kazakhstan, Kyrgyzstan, Mongolia, Altaians, Tuvas, Khakassians)	2340	2	0.000854701		n.a.
Other Near/Middel East populations (Druze, Bedouins, Egypt, Qatar, United Arab Emirates, Oman, Iran)	2698	0	0		n.a.
Reference: Underhill PA, Poznik GD, Rootsi S, Järve M, Lin AA, Wang J, Passarelli B, Kanbar J, Myres NM, King RJ, Di Cristofaro J, Sahakyan H, Behar DM, Kushniarevich A, Sarac J, Saric T, Rudan P, Pathak AK, Chaubey G, Grugni V, Semino O, Yepiskoposyan L, Bahmanimehr A, Farjadian S, Balanovsky O, Khusnutdinova EK, Herrera RJ, Chiaroni J, Bustamante CD, Quake SR, Kivisild T, Villems R. The phyloge…
