# Supplementary material for: A common 1.6 mb Y-chromosomal inversion predisposes to subsequent deletions and severe spermatogenic failure in humans
Source: eLife. 2021 Mar 30;10:e65420. doi: 10.7554/eLife.65420 (PMC8009663; doi:10.7554/eLife.65420)
Supplement: Supplementary file 16. [file elife-65420-supp16.xlsx]

## Sheet: Sheet1
Supplementary file 16. Y-chromosomal STS markers and PCR primers used for detection of partial AZFc deletions
STS markera	Deletion determined by the lack of amplification	PCR praimer sequence (5’-3’)b	Product length
sY1161	b1/b3	F: CGACACTTTTGGGAAGTTTCA	330 bp
		R: TTGTGTCCAGTGGTGGCTTA
sY1201	Positive control for amplification	F: CCGACTTCCACAATGGCT	677 bp
		R: GGGAGAAAAGTTCTGCAACG
sY1191	AZFc, b2/b3, b1/b3	F: CCAGACGTTCTACCCTTTCG	368 bp
		R: CCACACTCTAGCCTGATGAG
sY1291	AZFc, gr/gr, b1/b3	F: GATTCACGGTGACTAGGCTGAG	561 bp
		R: AATGGGAGAAAAGTTCTGCAACG
sY1206	AZFc	F: AGGAGGCAGAGATTGATCTC	412 bp
		R: TAGAAGAGACATGTGTGGCC
a - see Figure 1B for STS marker locations.
b - F - forward primer, R - reverse primer
