# Supplementary material for: A common 1.6 mb Y-chromosomal inversion predisposes to subsequent deletions and severe spermatogenic failure in humans
Source: eLife. 2021 Mar 30;10:e65420. doi: 10.7554/eLife.65420 (PMC8009663; doi:10.7554/eLife.65420)
Supplement: Supplementary file 17. [file elife-65420-supp17.xlsx]

## Sheet: Sheet1
Supplementary file 17. Genomic coordinates of regions sequenced using Illumina MiSeq
chr	start (GRCh38)	end (GRCh38)	Genomic region
chrY	22973664	22974053	BPY2_1
chrY	24607405	24607794	BPY2_1
chrY	25062313	25062702	BPY2_1
chrY	22984108	22984507	BPY2_2
chrY	24617849	24618248	BPY2_2
chrY	25051859	25052258	BPY2_2
chrY	22984483	22984727	BPY2_3
chrY	24618224	24618468	BPY2_3
chrY	25051639	25051883	BPY2_3
chrY	22987660	22988032	BPY2_4
chrY	24621401	24621773	BPY2_4
chrY	25048334	25048706	BPY2_4
chrY	22992137	22992505	BPY2_5
chrY	24625878	24626246	BPY2_5
chrY	25043861	25044229	BPY2_5
chrY	22994370	22994766	BPY2_6
chrY	24628111	24628507	BPY2_6
chrY	25041600	25041996	BPY2_6
chrY	22997373	22997622	BPY2_7
chrY	24631115	24631364	BPY2_7
chrY	25038743	25038992	BPY2_7
chrY	22998089	22998489	BPY2_8
chrY	24631831	24632231	BPY2_8
chrY	25037876	25038276	BPY2_8
chrY	23004877	23005273	BPY2_9
chrY	24638619	24639015	BPY2_9
chrY	25031092	25031488	BPY2_9
chrY	23005161	23005561	BPY2_10
chrY	24638903	24639303	BPY2_10
chrY	25030804	25031204	BPY2_10
chrY	17879866	17880253	CDY_1
chrY	18025753	18026140	CDY_1
chrY	25622081	25622468	CDY_1
chrY	24047662	24048049	CDY_1
chrY	17879510	17879950	CDY_2
chrY	18026056	18026496	CDY_2
chrY	24047306	24047746	CDY_2
chrY	25622384	25622824	CDY_2
chrY	17879162	17879615	CDY_3
chrY	18026391	18026844	CDY_3
chrY	24046961	24047411	CDY_3
chrY	25622719	25623169	CDY_3
chrY	17878835	17879217	CDY_4
chrY	18026789	18027171	CDY_4
chrY	24046634	24047016	CDY_4
chrY	25623114	25623496	CDY_4
chrY	17878519	17878878	CDY_5
chrY	18027128	18027487	CDY_5
chrY	24046318	24046677	CDY_5
chrY	25623453	25623812	CDY_5
chrY	17878162	17878559	CDY_6
chrY	18027447	18027844	CDY_6
chrY	24045961	24046358	CDY_6
chrY	25623772	25624169	CDY_6
chrY	17877694	17878200	CDY_7
chrY	18027806	18028312	CDY_7
chrY	24045513	24045999	CDY_7
chrY	25624131	25624617	CDY_7
chrY	17877290	17877775	CDY_8
chrY	18028231	18028716	CDY_8
chrY	24045109	24045594	CDY_8
chrY	25624536	25625021	CDY_8
chrY	23200596	23201071	DAZ_1
chrY	23217469	23217944	DAZ_1
chrY	24814981	24815456	DAZ_1
chrY	24831855	24832330	DAZ_1
chrY	24814620	24815038	DAZ_2
chrY	23200235	23200653	DAZ_2
chrY	24832273	24832691	DAZ_2
chrY	23217887	23218305	DAZ_2
chrY	24814273	24814657	DAZ_3
chrY	23199888	23200272	DAZ_3
chrY	24832654	24833038	DAZ_3
chrY	23218268	23218652	DAZ_3
chrY	24813865	24814326	DAZ_4
chrY	23199480	23199941	DAZ_4
chrY	24832985	24833446	DAZ_4
chrY	23218599	23219060	DAZ_4
chrY	24813423	24813902	DAZ_5
chrY	23199038	23199517	DAZ_5
chrY	23219023	23219502	DAZ_5
chrY	24833409	24833888	DAZ_5
chrY	24813085	24813552	DAZ_6
chrY	23198700	23199167	DAZ_6
chrY	23219373	23219840	DAZ_6
chrY	24833759	24834226	DAZ_6
chrY	23170200	23170654	DAZ_7
chrY	23181040	23181494	DAZ_7
chrY	23191888	23192342	DAZ_7
chrY	23226199	23226653	DAZ_7
chrY	24806271	24806725	DAZ_7
chrY	24840586	24841040	DAZ_7
chrY	24851434	24851888	DAZ_7
chrY	24805919	24806384	DAZ_8
chrY	23169848	23170313	DAZ_8
chrY	23180688	23181153	DAZ_8
chrY	23191536	23192001	DAZ_8
chrY	24840927	24841392	DAZ_8
chrY	24851775	24852240	DAZ_8
chrY	23226540	23227005	DAZ_8
chrY	23169170	23169570	DAZ_9
chrY	23180010	23180410	DAZ_9
chrY	23190858	23191258	DAZ_9
chrY	24805241	24805641	DAZ_9
chrY	24841670	24842070	DAZ_9
chrY	24852518	24852918	DAZ_9
chrY	23227283	23227683	DAZ_9
chrY	23168598	23169070	DAZ_10
chrY	23179438	23179910	DAZ_10
chrY	23190286	23190758	DAZ_10
chrY	24842170	24842642	DAZ_10
chrY	24853018	24853490	DAZ_10
chrY	23227783	23228255	DAZ_10
chrY	24804669	24805141	DAZ_10
chrY	23139683	23140082	DAZ_18
chrY	23280627	23281026	DAZ_18
chrY	24773406	24773806	DAZ_18
chrY	24896302	24896702	DAZ_18
chrY	24770920	24771356	DAZ_19
chrY	23137197	23137633	DAZ_19
chrY	24898752	24899188	DAZ_19
chrY	23283076	23283512	DAZ_19
chrY	24768812	24769073	DAZ_20
chrY	23135088	23135349	DAZ_20
chrY	24901035	24901296	DAZ_20
chrY	23285361	23285622	DAZ_20
chrY	24764622	24764998	DAZ_21
chrY	23130908	23131284	DAZ_21
chrY	24905110	24905486	DAZ_21
chrY	23289426	23289802	DAZ_21
chrY	24764208	24764657	DAZ_22
chrY	23130494	23130943	DAZ_22
chrY	24905451	24905900	DAZ_22
chrY	23289767	23290216	DAZ_22
chrY	24763771	24764233	DAZ_23
chrY	23130057	23130519	DAZ_23
chrY	24905875	24906337	DAZ_23
chrY	23290191	23290653	DAZ_23
chrY	24763393	24763793	DAZ_24
chrY	23129679	23130079	DAZ_24
chrY	24906315	24906715	DAZ_24
chrY	23290631	23291031	DAZ_24
chrY	24763022	24763416	DAZ_25
chrY	23129308	23129702	DAZ_25
chrY	24906692	24907086	DAZ_25
chrY	23291008	23291402	DAZ_25
chrY	23166982	23167450	DAZ 14F/13R
chrY	24803053	24803521	DAZ 14F/13R
chrY	24854638	24855106	DAZ 14F/13R
chrY	23229403	23229871	DAZ 14F/13R
chrY	23188665	23189138	DAZ 14F/13R
chrY	23177817	23178290	DAZ 14F/13R
chrY	24843790	24844263	DAZ 14F/13R
chrY	24771795	24772195	DAZ 26F/26R
chrY	23138072	23138472	DAZ 26F/26R
chrY	24897913	24898313	DAZ 26F/26R
chrY	23282237	23282637	DAZ 26F/26R
chrY	23140420	23140887	DAZ 15F/11R
chrY	23279822	23280289	DAZ 15F/11R
chrY	24774144	24774611	DAZ 15F/11R
chrY	24895497	24895964	DAZ 15F/11R
chrY	24800608	24801077	DAZ 16F/12R
chrY	23164535	23165004	DAZ 16F/12R
chrY	24857082	24857551	DAZ 16F/12R
chrY	23231847	23232316	DAZ 16F/12R
chrY	24793450	24793902	DAZ 11F/17R
chrY	24788694	24789146	DAZ 11F/17R
chrY	24783937	24784389	DAZ 11F/17R
chrY	23152597	23153049	DAZ 11F/17R
chrY	24873794	24874246	DAZ 11F/17R
chrY	24869037	24869489	DAZ 11F/17R
chrY	23255736	23256188	DAZ 11F/17R
chrY	23248581	23249033	DAZ 11F/17R
chrY	24893112	24893579	DAZ 11F/17R
chrY	24888343	24888810	DAZ 11F/17R
chrY	24885958	24886425	DAZ 11F/17R
chrY	23277437	23277904	DAZ 11F/17R
chrY	24791072	24791525	DAZ 11F/17R
chrY	24786315	24786768	DAZ 11F/17R
chrY	23159754	23160207	DAZ 11F/17R
chrY	23154975	23155428	DAZ 11F/17R
chrY	24871415	24871868	DAZ 11F/17R
chrY	24866658	24867111	DAZ 11F/17R
chrY	24861878	24862331	DAZ 11F/17R
chrY	23253357	23253810	DAZ 11F/17R
chrY	23246202	23246655	DAZ 11F/17R
chrY	23241422	23241875	DAZ 11F/17R
chrY	23236644	23237097	DAZ 11F/17R
chrY	24795828	24796281	DAZ 11F/17R
chrY	24791072	24791525	DAZ 12F/11R
chrY	24786315	24786768	DAZ 12F/11R
chrY	23159754	23160207	DAZ 12F/11R
chrY	23154975	23155428	DAZ 12F/11R
chrY	24871415	24871868	DAZ 12F/11R
chrY	24866658	24867111	DAZ 12F/11R
chrY	24861878	24862331	DAZ 12F/11R
chrY	23253357	23253810	DAZ 12F/11R
chrY	23246202	23246655	DAZ 12F/11R
chrY	23241422	23241875	DAZ 12F/11R
chrY	23236644	23237097	DAZ 12F/11R
chrY	24795828	24796281	DAZ 12F/11R
chrY	23142805	23143272	DAZ 12F/11R
chrY	24893112	24893579	DAZ 12F/11R
chrY	24890727	24891194	DAZ 12F/11R
chrY	24888343	24888810	DAZ 12F/11R
chrY	24885958	24886425	DAZ 12F/11R
chrY	24883573	24884040	DAZ 12F/11R
chrY	23277437	23277904	DAZ 12F/11R
chrY	23272669	23273136	DAZ 12F/11R
chrY	23265516	23265983	DAZ 12F/11R
chrY	23270285	23270752	DAZ 12F/11R
chrY	23267900	23268367	DAZ 12F/11R
chrY	23239019	23239486	DAZ 12F/11R
chrY	23234241	23234708	DAZ 12F/11R
chrY	24788694	24789146	DAZ 12F/11R
chrY	23142805	23143272	DAZ 11F/11R
chrY	24893112	24893579	DAZ 11F/11R
chrY	24890727	24891194	DAZ 11F/11R
chrY	24888343	24888810	DAZ 11F/11R
chrY	24885958	24886425	DAZ 11F/11R
chrY	24883573	24884040	DAZ 11F/11R
chrY	23277437	23277904	DAZ 11F/11R
chrY	23272669	23273136	DAZ 11F/11R
chrY	23270285	23270752	DAZ 11F/11R
chrY	23267900	23268367	DAZ 11F/11R
chrY	23265516	23265983	DAZ 11F/11R
chrY	23275053	23275520	DAZ 11F/11R
chrY	23157364	23157831	DAZ 11F/11R
chrY	23243799	23244266	DAZ 11F/11R
chrY	23239019	23239486	DAZ 11F/11R
chrY	24798217	24798684	DAZ 11F/11R
chrY	23162143	23162610	DAZ 11F/11R
chrY	24864255	24864722	DAZ 11F/11R
chrY	24859475	24859942	DAZ 11F/11R
chrY	23250954	23251421	DAZ 11F/11R
chrY	23234241	23234708	DAZ 11F/11R
chrY	24864255	24864722	DAZ 12F/12R
chrY	23157364	23157831	DAZ 12F/12R
chrY	23243799	23244266	DAZ 12F/12R
chrY	23239019	23239486	DAZ 12F/12R
chrY	24798217	24798684	DAZ 12F/12R
chrY	23162143	23162610	DAZ 12F/12R
chrY	24859475	24859942	DAZ 12F/12R
chrY	23250954	23251421	DAZ 12F/12R
chrY	23234241	23234708	DAZ 12F/12R
chrY	23142805	23143272	DAZ 12F/12R
chrY	24893112	24893579	DAZ 12F/12R
chrY	24890727	24891194	DAZ 12F/12R
chrY	24888343	24888810	DAZ 12F/12R
chrY	24885958	24886425	DAZ 12F/12R
chrY	24883573	24884040	DAZ 12F/12R
chrY	23277437	23277904	DAZ 12F/12R
chrY	23272669	23273136	DAZ 12F/12R
chrY	23270285	23270752	DAZ 12F/12R
chrY	23267900	23268367	DAZ 12F/12R
chrY	23265516	23265983	DAZ 12F/12R
chrY	23275053	23275520	DAZ 12F/12R
chrY	20577288	20577555	R1b1a1b-M269
chrY	21221769	21221946	R1a1a1b1a1a1c-CTS11962.1
chrY	13476367	13476596	R1a1a1b1a-Z282
chrY	15472901	15473332	R1a1a1b1a2a-Z92
chrY	7403598	7403884	R1a1a1b1a2b-CTS1211
chrY	14738834	14739091	I1a1-CTS6364
chrY	10009589	10009928	I1a2-S244
chrY	12280622	12280875	I1a3-Z63
chrY	14467565	14467847	I2a1a2b1a1-CTS5966
chrY	7038218	7038533	I2a1b1a-CTS616
chrY	8927887	8928187	R1b1a1b1a1a1-M405
chrY	19995259	19995531	R1b1a1b1a1a2-P312
chrY	11970561	11970859	R1b1a1b1b3a-CTS1843
chrY	12844010	12844428	R1b1a1b-CTS3475
chrY	6791942	6792239	N3a4 sublineage B536
chrY	7891706	7892000	N3a4 sublineage Z1940
chrY	8313814	8314114	N3a3b-VL39
chrY	8570441	8570839	N3a3b sublineage B613
chrY	8689483	8689883	N3a4 sublineage Z1941
chrY	11921382	11921660	N3a4 sublineage VL62
chrY	12005152	12005616	N3a3a sublineage B215
chrY	12458492	12458779	N3a3-VL29
chrY	15755031	15755429	N3a3a sublineage Z4912
chrY	15993810	15994209	N3a3b sublineage F467
chrY	15997166	15997520	N3a3a-sublineage Z4915
chrY	17037498	17037855	N3a4-B535
chrY	19124167	19124566	N3a3c sublineage L550
chrY	19798163	19798502	N3a3b sublineage B614
chrY	21082160	21082460	N3a3b sublineage B190
chrY	21224270	21224563	N3a3a sublineage B601
