# Supplementary material for: A common 1.6 mb Y-chromosomal inversion predisposes to subsequent deletions and severe spermatogenic failure in humans
Source: eLife. 2021 Mar 30;10:e65420. doi: 10.7554/eLife.65420 (PMC8009663; doi:10.7554/eLife.65420)
Supplement: Supplementary file 18. [file elife-65420-supp18.xlsx]

## Sheet: Sheet1
Supplementary file 18. PCR primers and reaction conditions to amplify regions of interest for sequencing with Illumina MiSeq. PCR primers to amplify the UTRs and coding exons (according to Ensembl release 84) of the retained DAZ, BPY2 and CDY genes were designed using Primer3 (v4.1.0, RRID:SCR_003139)
Some primer pairs designed for the DAZ genes amplified multiple regions due to high sequence similarity. The presence of all amplicons was confirmed using gel electrophoresis, followed by pooling the amplicons in approximately equimolar concentrations, barcoding per sample, and sequencing to high coverage (>40 ×) on Illumina MiSeq using paired-end 250-bp reads.
Y lineage and marker/ target gene	Genotyping method	Genomic coordinates on chrY (GRCh38)	Ancestral/ derived allele	Forward primer (5'-3')	Reverse primer (5'-3')	Product length (bp)	rs number	Multiplex mix	Final primer concentration (µM)	Annealing temperature	Reference
I1a1-CTS6364	Illumina MiSeq	14738899	A/T	ACCCTAGCACAGTGTTGGTT	ACATAAGAGTCAATAAACCCAAC	258	rs781183295	singleplex	0.3	59ᵒC	this study
I1a2-S244	Illumina MiSeq	10009814	T/C	TCATTTGAGAGAAGTGCCAT	GGCGTGATATTGGCTGTCTG	340	rs772609696	singleplex	0.3	59ᵒC	this study
I1a3-Z63	Illumina MiSeq	12280783	C/T	ATGGTGCATTGACTCCCTCT	GTGAGCCAAATCATGTGCCT	254	rs746842213	singleplex	0.3	59ᵒC	this study
I2a1a2b1a1-CTS5966	MiSeq/ Sanger seq.	14467619	T/A	ACAAGGCACAGTCAGGATCT	ACTTGCAGTCATGGTGAGT	283	rs750984371	singleplex	0.3	59ᵒC	this study
I2a1b1a-CTS616	MiSeq/ Sanger seq.	7038291	G/C	GGACAGGGCTTTATGTGAAGG	CCAGTAGCATCCACTCCCAT	316	rs751166844	singleplex	0.3	59ᵒC	this study
R1a1a1b1a-Z282	MiSeq/ Sanger seq.	13476521	T/C	GTTCTACAGGTTACAGGTTAGCA	TCATGTTGGAAAACGTTTTAGGT	230	rs112563127	singleplex	0.3	59ᵒC	this study
R1a1a1b1a1a1c-CTS11962.1	MiSeq/ Sanger seq.	21221843	C/T	TGGTCTTGAGCAGGTAGTGG	CTTTGCTGGAGGTCATCTGC	178	rs549564137	singleplex	0.3	59ᵒC	this study
R1a1a1b1a2a-Z92	MiSeq/ Sanger seq.	15473121	C/G	ATTCCTGTCAGTGGGATGCA	GAAATCCAGGTTCACAGGGC	432	rs111474733	singleplex	0.3	59ᵒC	this study
R1a1a1b1a2b-CTS1211	MiSeq/ Sanger seq.	7403681	C/A	TTGTGTGCACTTTGGGGATG	CTTTGCATCTCAGCCCTGTC	287	rs556726425	singleplex	0.3	59ᵒC	this study
R1b1a1b-CTS3475	Illumina MiSeq	12844192	C/A	TGTGTGGAAAGAAGAGTAAATT	TGTTCTTCCTGCTCAAGTTAAAG	419	rs35108305	singleplex	0.3	59ᵒC	this study
R1b1a1b-M269	Illumina MiSeq	20577481	T/C	TCTCCAAAACACGTCGGATT	CCCGGCCACTATACTTCTTTTG	268	rs9786153	singleplex	0.3	56ᵒC	this study
R1b1a1b1a1a1-M405	Illumina MiSeq	8928037	C/T	TTCTCCTCCACTTACCGACC	GAGGAAATGGGTGGCAGATG	301	rs16981293	singleplex	0.3	61ᵒC	this study
R1b1a1b1a1a2-P312	Illumina MiSeq	19995425	C/A	TTCTCAACCCACTGTCTGCC	TGACTTCAGATCCAGTGCTCA	273	rs34276300	singleplex	0.3	61ᵒC	this study
R1b1a1b1b3a-CTS1843	Illumina MiSeq	11970733	T/C	TCTCAGACACTACAGGGAGGA	CGGTGGTGGAATTTGTGAGG	299	rs752991313	singleplex	0.3	54ᵒC	this study
N3a3-VL29	Illumina MiSeq	12458624	T/C	AGCATGCAGATACACAAAGGT	ATTTGTGCAGAGAAGGTGGG	287	rs752512309	singleplex	0.2	56ᵒC	Shi et al 2019
N3a3a sublineage B215	Illumina MiSeq	12005300	G/C	ACAATTCTATTCCACTCCTTCTGG	GCCTTGTGTAGCAGGTGGAA	464	rs866167417	mix 12	0.2	52ᵒC	Shi et al 2019
N3a3a sublineage B601	Illumina MiSeq	21224405	T/C	GGCTGTTTTACTTACTGTGGCT	TGAAAATAGTTGAAGATGACACTACA	293	rs959624286	singleplex	0.3	55ᵒC	Shi et al 2019
N3a3a sublineage Z4912	Illumina MiSeq	15755201	G/T	ACTCACCAAAAGTATCAAGGACA	ACAGTGTCAAGATTTGCCAT	398	n.a.	mix 12	0.4	52ᵒC	Shi et al 2019
N3a3a-sublineage Z4915	Illumina MiSeq	15997352	T/C	GCCGCACTCATAAAATGCCA	CATCCTGGAACTCTCTGGCt	354	n.a.	mix 18	0.2	55ᵒC	Shi et al 2019
N3a3b sublineage B190	Illumina MiSeq	21082273	T/C	TGCAAAAGTGATTCCCATATTTAGA	TCCCTTAAGTGCTAAACAGAAGT	300	n.a.	mix 3	0.3	52ᵒC	Shi et al 2019
N3a3b sublineage B613	Illumina MiSeq	8570612	A/T	GGCTTTTATTAGATGGGACTGCC	CCACGACAAAAGCAAGTCCAATT	398	n.a.	mix 3	0.2	52ᵒC	Shi et al 2019
N3a3b sublineage B614	Illumina MiSeq	19798332	A/T	ACATACCCCTGAACAGCAAA	GGTCTTTTGCTTCTATCTATCATTCCA	339	rs1028563235	mix 15	0.2	56ᵒC	Shi et al 2019
N3a3b sublineage F467	Illumina MiSeq	15993979	G/C	AGATTCAAAGCCATGATTACTGGA	ACACCCACTTTTGCTTACATGA	399	n.a.	mix 17	0.2	50ᵒC	Shi et al 2019
N3a3b-VL39	Illumina MiSeq	8313974	T/C	CCTTGTGACATATCTCTGGGCTTA	GTCAAAATTACTTCTATTTGTGGGA	300	rs745485614	singleplex	0.2	58ᵒC	Shi et al 2019
N3a3c sublineage L550	Illumina MiSeq	19124362	C/T	TGAAATCCCCTCTGCTGCTC	ACTTGCCTCCATCTCTCCTTC	399	rs770885484	mix 11	0.2	58ᵒC	Shi et al 2019
N3a4 sublineage B536	Illumina MiSeq	6792045	C/T	AGCACATCTTTAACTACATCTCATGA	AGCAAAATGTCTATGGGCTTCC	297	rs767620531	mix 14	0.3	52ᵒC	Shi et al 2019
N3a4 sublineage VL62	Illumina MiSeq	11921458	C/T	ACAACTGTAGTCGATTGAACAA	CCTTGGCATTCCTGGACCTT	278	rs761996499	singleplex	0.2	56ᵒC	Shi et al 2019
N3a4 sublineage Z1940	Illumina MiSeq	7891854	G/A	CTGAGTCTTTAGTCTGGCAGCT	TCTTGGAATCTGTAAGGTCAACA	294	rs776529493	mix 16	0.2	56ᵒC	Shi et al 2019
N3a4 sublineage Z1941	Illumina MiSeq	8689673	T/G	CACAAACAGGAGTGCAGTTAG	CCACACTAAACGTTTCCTGGG	400	rs749507067	mix 4	0.3	52ᵒC	Shi et al 2019
N3a4-B535	Illumina MiSeq	17037673	G/C	TGACCTCGTTTTGGGTTTCTCT	GGGAGGAGATTGGATATAAGGGTAAT	357	rs778397318	mix 8	0.2	58ᵒC	Shi et al 2019
CDY1_1	Illumina MiSeq	see TableS15	na	AGCAACCACAATTAAACAAAGAAACA	TCAACCTCAAACTCCTGGGA	387		mix 6	0.2	52ᵒC	this study
CDY1_2	Illumina MiSeq	see TableS15	na	GGAGACGCAACTGAAACAAAGG	CGGAGAGAATTGAAGCTGCC	440		mix 19	0.2	55ᵒC	this study
CDY1_3	Illumina MiSeq	see TableS15	na	ACTCTCCTAAAACGCCAGTG	TGTCTGTTGTCCCATTGGCT	450		mix 2	0.3	52ᵒC	this study
CDY1_4	Illumina MiSeq	see TableS15	na	CGAAAGGGTATAGTGGTATTAATAGAC	TCACAAAGTACCCAAAATCAAGAC	382		mix 19	0.2	55ᵒC	this study
CDY1_5	Illumina MiSeq	see TableS15	na	GGAAGTGTCTTTTGCTGCGG	CATGCCTCCCTTGCTGTCA	359		mix 1	0.2	52ᵒC	this study
CDY1_6	Illumina MiSeq	see TableS15	na	TGTTAATTGCTGGGCGAAAG	TGGGTGAAATTGTTTTGGGCT	397		mix 2	0.2	52ᵒC	this study
CDY1_7	Illumina MiSeq	see TableS15	na	CCCTAATCCATCTTCATAGCCCAA	TCGTCAGTGGATTTTGAGCCA	486		mix 9	0.15	52ᵒC	this study
CDY1_8	Illumina MiSeq	see TableS15	na	GGCACAAACGCTTCAGAGAC	CCAACAAGACAGGATTCATAGAGC	485		mix 10	0.2	52ᵒC	this study
BPY2_1	Illumina MiSeq	see TableS15	na	CTTGGGACCTGCACACTTGA	ACCAGTCGAGAGTCACATTACC	389		singleplex	0.3	63.7ᵒC	this study
BPY2_2	Illumina MiSeq	see TableS15	na	AGAAAAGCTTTGTGACATATCTCT	ACCTAAGTGCTGGGCTCATT	399		mix 15	0.3	56ᵒC	this study
BPY2_3	Illumina MiSeq	see TableS15	na	TGTTAATGAGCCCAGCACTT	ACACGTACAGAAAGGGAACA	244		mix 18	0.3	55ᵒC	this study
BPY2_4	Illumina MiSeq	see TableS15	na	GACTCTTCCAAGCCAGCAGA	CGTGAGACTGCCTATGAGAGT	372		mix 2	0.3	52ᵒC	this study
BPY2_5	Illumina MiSeq	see TableS15	na	CCTGCCTAAGTTCTGCTCACA	GTCCAAATGTCATCTGCGGG	368		mix 5	0.2	55ᵒC	this study
BPY2_6	Illumina MiSeq	see TableS15	na	GGCCCATTTTCTAGGTGTTTTCA	ACCCTTTGTATCACCCAGGAAAT	396		mix 1	0.2	52ᵒC	this study
BPY2_7	Illumina MiSeq	see TableS15	na	AGAGAGGGTTGTTACATATTGCG	GCTTAACCCAGGTACGTGTCA	249		mix 13	0.2	52ᵒC	this study
BPY2_8	Illumina MiSeq	see TableS15	na	TGACTCCTCCATTTTGATCCAACT	CAATGCCCTGTAAGTGCATGG	400		singleplex	0.3	55ᵒC	this study
BPY2_9	Illumina MiSeq	see TableS15	na	TCATCGGTGATAACATCTAGGA	TGAGAACCATTACTTTGCTTGTGG	396		mix 10	0.3	52ᵒC	this study
BPY2_10	Illumina MiSeq	see TableS15	na	CCCAGCTTCAGATACCATGCA	AGTCCCAGCCTCACAGATGT	400		mix 16	0.3	56ᵒC	this study
DAZ_1	Illumina MiSeq	see TableS15	na	ACTACATATGTGGATGGGTCT	TCCTTCTACAACCTAGGCTGA	475		mix 14	0.3	52ᵒC	this study
DAZ_2	Illumina MiSeq	see TableS15	na	TTTACTGTGAGCGTGTCCTT	GCAGGAGGTAAGGGCTCAAG	418		singleplex	0.3	55ᵒC	this study
DAZ_3	Illumina MiSeq	see TableS15	na	TCAGTTCCAGCTCCCACCTT	CTGGACTGCTATAACGTGAGAC	384		mix 18	0.2	55ᵒC	this study
DAZ_4	Illumina MiSeq	see TableS15	na	CCCGCATTACTAGATGTCAGTAGT	GGTTGGATGGGAGGGAACG	461		mix 16	0.2	56ᵒC	this study
DAZ_5	Illumina MiSeq	see TableS15	na	CCTGAATGTCAAAACTGGCGT	GCTCCTGTGCCGGGTATC	479		mix 11	0.2	58ᵒC	this study
DAZ_6	Illumina MiSeq	see TableS15	na	GTACTCTACGCACCCACAGC	CCCCGAAACAGGAAAACCGA	467		mix 8	0.2	58ᵒC	this study
DAZ_7	Illumina MiSeq	see TableS15	na	GAGCCTGAACTGAGCTGCAC	ACCAGCAGCCCTTTGTCAAA	454		mix 5	0.25	55ᵒC	this study
DAZ_8	Illumina MiSeq	see TableS15	na	GGATGTGGGCCCTGTTACAA	TGGTAATAGCCTTTTATCCCCTACG	466		mix 4	0.2	52ᵒC	this study
DAZ_9	Illumina MiSeq	see TableS15	na	ACATCTTAGCAAATACTTATCATGGT	CACCCTGTCTCCAACCCTTC	400		mix 14	0.3	52ᵒC	this study
DAZ_10	Illumina MiSeq	see TableS15	na	GCGTAGTTGTCCCCGATCTT	CCACAGAGGGAAGGATGACT	472		mix 6	0.3	52ᵒC	this study
DAZ_11F + 11R	Illumina MiSeq	see TableS15	na	GTGTAGCACTTGACATRGAATCT	TSCCAAGTAYATTCCTGTCAAA	452453467		singleplex	0.3	49.5ᵒC	this study
DAZ_11F + 17R	Illumina MiSeq	see TableS15	na	GTGTAGCACTTGACATRGAATCT	TGCCAAGGATATTCCTGTAAAA	452		singleplex	0.3	49.5ᵒC	this study
DAZ_12F + 11R	Illumina MiSeq	see TableS15	na	GTGTAGCACTTGWCMTAGAATCT	TSCCAAGTAYATTCCTGTCAAA	452453467		singleplex	0.3	49.5ᵒC	this study
DAZ_12F + 12R	Illumina MiSeq	see TableS15	na	GTGTAGCACTTGWCMTAGAATCT	TGCCARGTATATTCCTCTCAAA	452453467		singleplex	0.3	49.5ᵒC	this study
DAZ_14F + 13R	Illumina MiSeq	see TableS15	na	GGGTAGCACTTGACAGAGAATAT	TGCTAAGTACCCTCCTGTCAAA	468473		singleplex	0.3	52ᵒC	this study
DAZ_15F + 11R	Illumina MiSeq	see TableS15	na	GTGTGGCACATGACATAGACTAT	TSCCAAGTAYATTCCTGTCAAA	467		singleplex	0.3	54ᵒC	this study
DAZ_16F + 12R	Illumina MiSeq	see TableS15	na	CCATAGCACTTGACCGAGAATAA	TGCCARGTATATTCCTCTCAAA	470		singleplex	0.3	49.5ᵒC	this study
DAZ_18	Illumina MiSeq	see TableS15	na	GTGTGGTTTCGTATTTGTATGTGGA	CCATGGGAGATTGTAACTGGGT	399		mix 7	0.2	56ᵒC	this study
DAZ_19	Illumina MiSeq	see TableS15	na	TCACTTTAATAACAAATGAGCCAGCA	GCCAGTTAATACCGCCATTCC	436		mix 13	0.2	52ᵒC	this study
DAZ_20	Illumina MiSeq	see TableS15	na	AACCAAAACACACCCTTATTAAG	CCCAAAATACATGTGCCACA	262		mix 9	0.2	52ᵒC	this study
DAZ_21	Illumina MiSeq	see TableS15	na	TGACAACTTTCAGATCCATAGTAGT	TCTTAACATTCTTTCAGTCTCGA	376		mix 17	0.3	50ᵒC	this study
DAZ_22	Illumina MiSeq	see TableS15	na	AGTAACAAATAATCGAGACTGAAAGA	TCCTAACTACTATCCCAATCAAATT	449		singleplex	0.3	50ᵒC	this study
DAZ_23	Illumina MiSeq	see TableS15	na	AATTTGATTGGGATAGTAGTTAGGA	AGAGGCTGGGAAAACAAGAC	462		mix 1	0.3	52ᵒC	this study
DAZ_24	Illumina MiSeq	see TableS15	na	CAGTCTTGTTTTCCCAGCCTC	GTCATGGTGCTTTCAATTTCTGA	400		mix 13	0.2	52ᵒC	this study
DAZ_25	Illumina MiSeq	see TableS15	na	TCAGAAATTGAAAGCACCATGAC	ACGCAACTCCCCACCATTTT	394		mix 9	0.3	52ᵒC	this study
DAZ_26	Illumina MiSeq	see TableS15	na	GGCTTAGCACTTGACAGAGAATATTT	ACCATTGCAAGTGTTTTCCTAAATTT	400		singleplex	0.3	49.5ᵒC	this study
Reference: Shi et al (2019) Evolutionary and functional analysis of RBMY1 gene copy number variation on the human Y chromosome. Hum Mol Genet, Aug 15;28(16):2785-2798
