# Supplementary material for: A common 1.6 mb Y-chromosomal inversion predisposes to subsequent deletions and severe spermatogenic failure in humans
Source: eLife. 2021 Mar 30;10:e65420. doi: 10.7554/eLife.65420 (PMC8009663; doi:10.7554/eLife.65420)
Supplement: Supplementary file 19. [file elife-65420-supp19.xlsx]

## Sheet: Sheet1
Supplementary file 19. PCR primers used for typing of Y phylogenetic markers
Y lineage and marker	Genotyping method (restriction enzyme)	Genomic coordinates on chrY (GRCh38)	Ancestral/ derived allele	Forward primer (5'-3')	Reverse primer (5'-3')	Product length (bp)	rs number
A1-V168	Sanger sequencing	15835792	G/A	AAAATGCCCTGTGAAGACGG	CATCCCTTGGTCATCCCTC	317	rs191856881
A1a-M31	Sanger sequencing	1977868	G/C	GAACCAGACAATACGAAATAGAAG	TTTAGCGGCTTATCTCATTACC	486	rs369315948
A1b-P108	Sanger sequencing	13314368	C/T	AGTGACAAATCTGCACATAAACC	GTCTTGGCAGTCTCGTCAAA	474	rs761539052
B-M181	Sanger sequencing	12739620	T/C	GTTGCCAGGTATTAAATGACAGT	TGGAAGAAACAACAATGACCAAT	461	rs2032599
BT-M42	Sanger sequencing	19704954	A/T	AAAGCGAGAGATTCAATCCAG	TTTTAGCAAGTTAAGTCACCAGC	340	rs2032630
C-M216	Sanger sequencing	13325684	C/T	CTCAACCAGTTTTTATGAAGCTAG	GAGAGTCTGAACTAATGTGTCTTGT	557	rs2032666
CT-M168	Sanger sequencing	12702062	C/T	AGTTTGAGGTAGAATACTGTTTGCT	AATCTCATAGGTCTCTGACTGTTC	473	rs2032595
E1b1b1-M35	Sanger sequencing	19579817	G/C	TAAGCCTAAAGAGCAGTCAGAG	AGAGGGAGCAATGAGGACA	513	rs375228668
G-M201	Sanger sequencing	12915617	G/T	TATGCATTTGTTGAGTATATGTC	GTTCTGAATGAAAGTTCAAACG	326	rs2032636
GHIJK-M3658	Sanger sequencing	8720990	C/T	GAACAGGCAAGTGTAGAGGC	AGGGTCTTCATGTCTTAAGGCA	389	rs9786482
I1-M253	Sanger sequencing	12910796	C/T	GCAACAATGAGGGTTTTTTTG	CAGCTCCACCTCTATGCAGTTT	400	rs9341296
I2-M438	Sanger sequencing	14526924	A/G	ATGCTTCATATACAGTAGGC	AAGAGACCCCTGCACTTGTG	351	rs17307294
J-M304	Sanger sequencing	20587967	A/C	CACTGTGCTTGCCTTTTGTG	TGGAAGCTCGCCATATGC	353	rs13447352
J2b2a1-L283	Sanger sequencing	7064622	C/G	ACAACCCTTCAACCAGACCT	AGAATTTGTTCACTGGTGCAC	496	rs774409727
K-M9	Sanger sequencing	19568371	C/G	GCAGCATATAAAACTTCAGGA	AAAACCTAACTTTGCTCAAGC	340	rs3900
N3-M46/Tat	RFLP (NlaIII)	12810648	T/C	GACTCTGAGTGTAGACTTGTGA	GAAGGTGCCGTAAAAGTGTGAA	112	rs34442126
P-M45	Sanger sequencing	19705901	G/A	AATCACTCCTGTATGCTAGCAG	TCTTCAGCTGCTTGTCCTC	300	rs2032631
Q-M242	Sanger sequencing	12906671	C/T	AACTCTTGATAAACCGTGCTG	TCCAATCTCAATTCATGCCTC	366	rs8179021
R1a1a-M198	RFLP (SacI)	12918840	C/T	CATAGTTTTTTGTATGGCCAACC	CTTCCTGTTTAAACCGTTCTTG	426	rs2020857
R1a1a1-M417	Sanger sequencing	8665694	G/A	GACCCGCCTGCATCAAAAT	GAGCGGGAATGGAGTAGGAA	390	rs17316771
R1a1a1a1-L664	Sanger sequencing	15163167	T/G	TCCTGAGACAGTGTATCCGC	TGGGATGGGAAATGATGTTTCTG	380	rs766823340
R1a1a1b-Z645	Sanger sequencing	8377004	C/T	TGTCACAATTTCAACAGCGGT	AACAGAGCCTATGAGTGAGATAC	397	rs111731595
R1a1a1b1-Z283	Sanger sequencing	19814417	T/A	GACAGGCAGGATTGGGGTAT	AGGCATAGGACTTCAAGTAGGA	285	rs112309702
R1a1a1b1a1-Z2915	Sanger sequencing	7501105	C/A	CCTGCAAAACATGGCTCCT	AAACACCAAGGACGGCTGT	500	rs561492372
R1a1a1b1a1a-M458	Sanger sequencing	22220317	A/G	AGGACAGAGAGAGATAATCAGGT	CCCTTATTTCTGGGATAGTACTCT	511	rs375323198
R1a1a1b1a1a1a-L260	Sanger sequencing	16136950	G/T	GGGAGAAGATTGACACCTGC	CATCACATTCAAAGCACCTAAGT	356	rs963472073
R1a1a1b1a1a1a1a1-Y2905	Sanger sequencing	8992844	G/A	TGCCCGGAAACAGTATTGGA	GTTCTGGGGTCCTTTTCACC	343	rs1007742509
R1a1a1b1a1a1a1a2-Y4135	Sanger sequencing	9546148	G/C	TATCTCTGTCTGGCGAGGAG	GGTGCTTAAAACGAGTTCATGG	493	rs762898209
R1a1a1b1a1a1a1a3-YP414	Sanger sequencing	12052921	T/C	CCCCATCTTCAAATACCATCTGT	TCTGCCCTCCAAATTTCACA	395	n.a.
R1a1a1b1a1a1b~-Y85512	Sanger sequencing	8107776	C/T	GCAGAAACAGCTAGCACCAT	TTTTGTTGATAACTGCTTGCCA	466	n.a.
R1a1a1b1a1a1c1-L1029	Sanger sequencing	15825380	A/G	TTGGTGGCATGGACTCTGAT	GGGATTGAAAGGAGATGACACA	399	rs554497354
R1a1a1b1a1a1c1a-YP263	Sanger sequencing	19385165	G/T	AGGTGCTGAATCCCCACAAT	CCCCAACCTAGCAAGACAGA	368	rs962346532
R1a1a1b1a1a1c1b-YP416	Sanger sequencing	12329982	A/T	CCCCTGTGAGGAAATGATTTAAG	GACAGAGTGACTGCTTCCCA	473	rs759234946
R1a1a1b1a1a1c1c-YP417	Sanger sequencing	13756598	G/A	TCCCTGACAACTGACTGCTT	TGACTGTTCCAACTACTCTGTGA	232	rs542059244
T-M184	Sanger sequencing	12786229	G/A	CACTTTATTTTAGTCTGTGTCTTTTTC	AAACTTAGTAACATCTATTTCTCCTCT	305	rs20320
