# Supplementary material for: A common 1.6 mb Y-chromosomal inversion predisposes to subsequent deletions and severe spermatogenic failure in humans
Source: eLife. 2021 Mar 30;10:e65420. doi: 10.7554/eLife.65420 (PMC8009663; doi:10.7554/eLife.65420)
Supplement: Supplementary file 20. [file elife-65420-supp20.xlsx]

## Sheet: Sheet1
Supplementary file 20. PCR primers and probes used for copy number detection of DAZ, BPY2 and CDY genes using droplet digital PCR
PCR primers	Targeted gene	Sequence 5’-3’	Product size (bp)	Annealing/extension temperature used in ddPCR	Reference
GHSRYE3-F	SRY	CGAAGATGCTGCCGAAGAATTG	114	59C/61C	Tomaszkiewicz et al 2016
GHSRYE3-R	SRY	GTGTGGCTTTCGTACAGTCATC			Tomaszkiewicz et al 2016
HBPYE2thru3_F	BPY	CCAGCACTGAGGTAGAGTAGAG	96	59C	Tomaszkiewicz et al 2016
GHBPYE2thru3_R	BPY	GGTGATGTGACAGCCTCAAAG			Tomaszkiewicz et al 2016
GHCDYC_F	CDY	CCAGAGTGCTTCCAGGAAATAG	113	59C	Tomaszkiewicz et al 2016
HCDYC_R	CDY	TGGCTCGGAGTCTGAAGTATG			Tomaszkiewicz et al 2016
DAZ_pr1_F	DAZ	TGGACATGTGTTTAAAGTGGC	94	61C	this study
DAZ_pr1_R	DAZ	TGGCCCATAGTAACGACATT			this study
Probes*
SRY_pr1_HEX	SRY	HEX / CTTCCCGCAGATCCCG[C]TTCGG / BHQ-1	n.a.	59C/61C	Shi et al 2019
BPY2_pr1_FAM	BPY2	FAM/ TGTCACCAAGCACACTATTGCCAGG / BHQ-1	n.a.	59C	this study
CDY_pr1_FAM	CDY	FAM/ ACCCTTT[G]TAACA[C]ATTGGAGT[C]CA / BHQ-1	n.a.	59C	this study
DAZ_pr1_FAM	DAZ	FAM/ TGGCCCTTCTTT[C]AATGGCTTCTTC / BHQ-1	n.a.	61C	this study
*LNA bases are in []
References:
Tomaszkiewicz et al (2016) A time- and cost-effective strategy to sequence mammalian Y Chromosomes: an application to the de novo assembly of gorilla Y. Genome Res Apr;26(4):530-40
Shi et al (2019) Evolutionary and functional analysis of RBMY1 gene copy number variation on the human Y chromosome. Hum Mol Genet, Aug 15;28(16):2785-2798
