# Supplementary material for: A common 1.6 mb Y-chromosomal inversion predisposes to subsequent deletions and severe spermatogenic failure in humans
Source: eLife. 2021 Mar 30;10:e65420. doi: 10.7554/eLife.65420 (PMC8009663; doi:10.7554/eLife.65420)
Supplement: Supplementary file 21. [file elife-65420-supp21.xlsx]

## Sheet: Sheet1
Supplementary file 21. Paralogous sequence variants used to determine the retained DAZ and CDY1 genes
I. Nine DAZ PSVs present in the Illumina MiSeq dataset
PSV	Location	Genotype and discriminated genes	Genomic coordinate on chrY (GRCh38)
I	Intron	A (DAZ1/2) vs G (DAZ3/4)	DAZ1:23170603, DAZ1:23181443, DAZ1:23192291, DAZ2:23226251, DAZ3:24806674, DAZ4:24840638, DAZ4:24851486
II	Intron	C (DAZ1) vs T (DAZ2/3/4)	DAZ1:23169521, DAZ1:23180361, DAZ1:23191209, DAZ2:23227333, DAZ3:24805592, DAZ4:24841720, DAZ4:24852568
III	Intron	T (DAZ1/2) vs TT (DAZ3/4)	DAZ1:23140014, DAZ2:23280696, DAZ3:24773738, DAZ4:24896371
IV	Intron	G (DAZ1) vs A (DAZ2/3/4)	DAZ1:23167027, DAZ2:23229827, DAZ3:24803098, DAZ4:24855062
V	Exon	C (DAZ1/3/4) vs T (DAZ2)	DAZ1:23167251, DAZ2:23229603, DAZ3:24803322, DAZ4:24854838
VI	Intron	T (DAZ1/4) vs G (DAZ2)	DAZ1:23142866, DAZ2:23277844, DAZ2:23273076, DAZ2:23270692, DAZ2:23268307, DAZ2:23265923, DAZ2:23275460, DAZ4:24886365, DAZ4:24883980, DAZ4:24888750, DAZ4:24893519, DAZ4:24891134
VII	Intron	G (DAZ1/2) vs A (DAZ3/4)	DAZ1:23140450, DAZ2:23280260, DAZ3:24774174, DAZ4:24895935
VIII	Intron	A (DAZ1/2/3) vs G (DAZ/4)	DAZ1:23157705, DAZ2:23243926, DAZ2:23239146, DAZ3:24798136, DAZ4:24864382
IX	Intron	C (DAZ1) vs T (DAZ2/3/4)	DAZ1:23167027, DAZ2:23229827, DAZ3:24803098, DAZ4:24855062
II. PSVs from previously published papers used to determine and validate the retained CDY1 and DAZ gene types
Gene	Primers/PSV ID	Discrimination	Genotyping method (restriction enzyme)	Forward primer (5'-3')	Reverse primer (5'-3')	Product length (bp)	Reference
CDY1	o1025/o1026	CDY1a from CDY1b	RFLP (PvuII)	GAAATGCCATAATGTGCTAACACTG	AAGGAGAGTGTTAATACATACCCTG	201	Machev et al. 2004
DAZ	DAZI	DAZ1/2/3 from DAZ4	Sanger sequencing	CACAGGCACTCAGTAACTATCTC	CAGTGTTTCACCCACCACTTCTGGGT	709	Fernandes et al. 2002
DAZ	DAZII	DAZ1 from DAZ2/3/4	Sanger sequencing	GACATCCACGTCATTAACAAACG	GGAAGCTGCTTTGGTAGATAC	671	Fernandes et al. 2002
DAZ	DAZIII	DAZ2 from DAZ1/3/4	Sanger sequencing	GTGTGGCACATATGCCTATAAA	TTGGTACATCCAGATGCAGAT	301	Fernandes et al. 2002
DAZ	o912/o913	DAZ1/2 from DAZ3/4	Sanger sequencing	TGTATTTAAAATGTGCACTTCACTGT	CCAGTCACAAAATGCCACAT	251	Machev et al. 2004
DAZ	Y-DAZ3	DAZ3 from DAZ1/2/4	presence (DAZ3) or absence (others) of PCR product	GCTAGAACCAAATATTCTGGAT	ACTCCTCAGACACTCTATTAGTT	256	Fernandes et al. 2002
References:
Machev et al (2004) Sequence family variant loss from the AZFc interval of the human Y chromosome, but not gene copy loss, is strongly associated with male infertility. J Med Genet. Nov;41(11):814-25
Fernandes et al (2002) High frequency of DAZ1/DAZ2 gene deletions in patients with severe oligozoospermia. Mol Hum Reprod. Mar;8(3):286-98
